# Supplementary material for: Projecting Global Land-Use Change and Its Effect on Ecosystem Service Provision and Biodiversity with Simple Models
Source: PLoS One. 2010 Dec 15;5(12):e14327. doi: 10.1371/journal.pone.0014327 (PMC3002265; doi:10.1371/journal.pone.0014327)
Supplement: Table S4 — Change in cropland grid cell area under the country scenario. (0.07 MB XLS) [file pone.0014327.s011.xls]

## Sheet: Sheet1
Table S4. Change in cropland grid cell area under the country scenario.
Country	c00	c15	c15 / c00 (delta)	cgc00	cgc15	Area of cgc00 (hectares)	Area of cgc15 (hectares)	Area of cgc15 / Area of cgc00	ncgc15 / cgc15	Area of ncgc00 (ha)	Area of ocgc15 (ha)
Afghanistan	8045000	8.053e+06	1.001	5759	5765	1.01375e+07	1.01507e+07	1.0013	0.0142312	146022	1.00046e+07
Albania	699000	701994	1.00428	1022	1026	1.65082e+06	1.65732e+06	1.00394	0.0108911	19386.5	1.63793e+06
Algeria	8192000	8.51885e+06	1.0399	917	954	1.5898e+06	1.65595e+06	1.04161	0.148109	245926	1.41003e+06
Angola	3300000	3590000	1.08788	2491	2710	5.1552e+06	5.61773e+06	1.08972	0.0813219	462524	5.1552e+06
Antigua and Barbuda	10000	10000	1	0	0	0	0	0	0	0	0
Argentina	28900000	3.07403e+07	1.06368	29470	31347	5.26235e+07	5.59558e+07	1.06332	0.0670856	3.73524e+06	5.22206e+07
Armenia	560000	543193	0.969987	1415	1373	2.31241e+06	2.24334e+06	0.970132	0	0	2.24334e+06
Aruba	2000	2000	1	0	0	0	0	0	0	0	0
Australia	47600000	5.41268e+07	1.13712	33474	38064	5.97673e+07	6.88462e+07	1.1519	0.121562	9.15202e+06	5.96942e+07
Austria	1470000	1.41921e+06	0.965449	960	927	1.36952e+06	1.32231e+06	0.965529	0	0	1.32231e+06
Azerbaijan	2062400	2.09398e+06	1.01531	1401	1422	2.29103e+06	2.3252e+06	1.01492	0.0155697	34170.8	2.29103e+06
Bahamas	11000	13333.3	1.21212	4	5	7920.6	9881.42	1.24756	0.2	1960.82	7920.6
Bahrain	6000	6000	1	0	0	0	0	0	0	0	0
Bangladesh	8484000	8.26626e+06	0.974335	6630	6460	1.29906e+07	1.26579e+07	0.974389	0.00543565	92590.2	1.25653e+07
Barbados	17000	17000	1	0	0	0	0	0	0	0	0
Belarus	6257000	4.85366e+06	0.775717	10834	8404	1.38252e+07	1.06817e+07	0.77263	0	0	1.06817e+07
Belgium	883000	835580	0.946297	874	827	1.18471e+06	1.12078e+06	0.94603	0.00493827	0	1.12078e+06
Belize	99000	131143	1.32468	148	196	302325	400728	1.32549	0.252632	98403.1	302325
Benin	2645000	3.86564e+06	1.46149	873	1276	1.83974e+06	2.69066e+06	1.46253	0.32089	850924	1.83974e+06
Bhutan	160000	214545	1.34091	587	587	1.11982e+06	1.11982e+06	1	0	0	1.11982e+06
Bolivia	3131000	3.56076e+06	1.13726	3054	3473	6.23076e+06	7.08831e+06	1.13763	0.131624	929032	6.15927e+06
Bosnia and Herzegovina	1100000	1.09102e+06	0.991833	2122	2105	3.26047e+06	3.23413e+06	0.991922	0	0	3.23413e+06
Botswana	380000	380000	1	2546	2546	5.0369e+06	5.03695e+06	1.00001	0.00156863	7804.58	5.02914e+06
Brazil	65200000	7.23247e+07	1.10927	139224	154437	2.85678e+08	3.17261e+08	1.11055	0.108091	3.45971e+07	2.82664e+08
Brunei	13000	35285.7	2.71429	14	38	29910.7	81208.6	2.71503	0.605263	51297.9	29910.7
Bulgaria	3778000	3.06713e+06	0.811838	4345	3527	6.81108e+06	5.51737e+06	0.810057	0.000288434	0	5.51737e+06
Burkina Faso	4100000	6.28995e+06	1.53413	8200	11892	1.71722e+07	2.49187e+07	1.4511	0.312647	7.81978e+06	1.70989e+07
Burma	10498000	1.14228e+07	1.08809	20736	22563	4.15647e+07	4.51376e+07	1.08596	0.0863027	3.76828e+06	4.13693e+07
Burundi	1320000	1.36839e+06	1.03666	530	549	1.13422e+06	1.17486e+06	1.03583	0.0462107	59903	1.11496e+06
Cambodia	3840000	3.89147e+06	1.0134	5057	5125	1.05786e+07	1.07206e+07	1.01341	0.0167191	173373	1.05472e+07
Cameroon	7160000	7160000	1	2952	2952	6.24448e+06	6.24448e+06	1	0	0	6.24448e+06
Canada	52178000	5.24245e+07	1.00472	34737	34901	4.66298e+07	4.67864e+07	1.00336	0.0128929	584796	4.62016e+07
Cape Verde	47000	53170.2	1.13128	0	0	0	0	0	0	0	0
Cayman Islands	1000	1000	1	0	0	0	0	0	0	0	0
Central African Republic	2024000	2.03813e+06	1.00698	638	642	1.34742e+06	1.35592e+06	1.00631	0.00631912	8503.02	1.34742e+06
Chad	3550000	4.55045e+06	1.28182	12339	15816	2.59121e+07	3.32466e+07	1.28305	0.220022	7.33664e+06	2.59099e+07
Chile	2324000	1.76453e+06	0.759265	2959	2247	4.97098e+06	3.75989e+06	0.756368	0	0	3.75989e+06
China	148657000	1.64642e+08	1.10753	105643	117003	1.80088e+08	1.98371e+08	1.10153	0.136004	2.6336e+07	1.72035e+08
Colombia	4545000	3284217	0.7226	14910	10774	3.17515e+07	2.29354e+07	0.722339	9.29023e-05	0	2.29354e+07
Comoros	130000	153009	1.17699	20	20	41979	41979	1	0	0	41979
Cook Islands	6000	6000	1	0	0	0	0	0	0	0	0
Costa Rica	525000	571324	1.08824	1337	1396	2.81981e+06	2.94411e+06	1.04408	0.0620843	189642	2.71515e+06
Côte d'Ivoire	6800000	8.14165e+06	1.1973	7773	9307	1.65481e+07	1.98062e+07	1.19688	0.168768	3.33266e+06	1.64735e+07
Croatia	1586000	1103400	0.695712	1873	1303	2.83482e+06	1.96066e+06	0.691636	0	0	1.96066e+06
Cuba	4334000	4.89479e+06	1.12939	3499	3952	6.97072e+06	7.87259e+06	1.12938	0.116067	919811	6.95278e+06
Cyprus	140000	150458	1.0747	269	289	471808	506850	1.07427	0.0833333	35042.1	471808
Cyprus	140000	150458	1.0747	269	289	471808	506850	1.07427	0.0833333	35042.1	471808
Czech Republic	3318000	3.21966e+06	0.970361	3186	3092	4.41338e+06	4.28358e+06	0.970589	0	0	4.28358e+06
Democratic Republic of the Congo	7800000	7800000	1	4340	4340	9.28866e+06	9.28862e+06	0.999996	0.00484206	44885.4	9.24374e+06
Denmark	2289000	2.15577e+06	0.941795	2680	2524	3.21402e+06	3.02638e+06	0.941618	0	0	3.02638e+06
Djibouti	1000	1000	1	7	7	14715	14715	1	0	0	14715
Dominica	19000	24937.5	1.3125	0	0	0	0	0	0	0	0
Dominican Republic	1318000	1.28871e+06	0.977778	981	959	1.98862e+06	1.94397e+06	0.977549	0.0260688	50737.7	1.89324e+06
East Timor	187000	211488	1.13095	334	378	707478	800677	1.13173	0.126005	101668	699009
Ecuador	2979000	2.6093e+06	0.875897	4056	3553	8.6903e+06	7.61281e+06	0.876013	0.000281928	0	7.61281e+06
Egypt	3291000	4.00987e+06	1.21843	1223	899	2.25505e+06	1.65928e+06	0.735809	0.0625711	103384	1.5559e+06
El Salvador	890000	950899	1.06843	739	728	1.53859e+06	1.51571e+06	0.98513	0.0267983	43785.1	1.47192e+06
Equatorial Guinea	230000	220000	0.956522	146	140	312815	299955	0.958892	0	0	299955
Eritrea	563000	759531	1.34908	1149	1167	2.37997e+06	2.41727e+06	1.01567	0.027234	68357.7	2.34892e+06
Estonia	855000	455424	0.532659	2096	1116	2.3393e+06	1.2552e+06	0.536572	0.0062333	0	1.2552e+06
Ethiopia	10695000	1.88188e+07	1.75959	22433	31229	4.7383e+07	6.60533e+07	1.39403	0.283301	1.87656e+07	4.72877e+07
Federated States of Micronesia	23000	23000	1	0	0	0	0	0	0	0	0
Fiji Islands	285000	338438	1.1875	49	58	100049	118453	1.18395	0.206897	24482.1	93971.1
Finland	2192000	2.15828e+06	0.984615	888	874	883905	869516	0.983722	0	0	869516
France	19582000	1.99659e+07	1.0196	17548	17892	2.54904e+07	2.60055e+07	1.02021	0.0424338	1.11271e+06	2.48928e+07
French Polynesia	23000	25000	1.08696	0	0	0	0	0	0	0	0
Gabon	495000	500476	1.01106	298	301	638634	645073	1.01008	0.0231023	15003	630070
Gambia	290000	514138	1.77289	387	467	806604	973484	1.20689	0.184211	177309	796175
Georgia	1062000	1.05419e+06	0.992649	958	951	1.53174e+06	1.52048e+06	0.992654	0.00212314	0	1.52048e+06
Germany	12020000	1.1989e+07	0.997419	14941	14902	1.99501e+07	1.98977e+07	0.997374	6.75219e-05	66063.7	1.98316e+07
Ghana	6100000	7.44917e+06	1.22117	3754	4584	7.98629e+06	9.74947e+06	1.22078	0.197013	1.92512e+06	7.82434e+06
Greece	3854000	3.65192e+06	0.947567	2621	2484	4.31272e+06	4.08456e+06	0.947094	0	0	4.08456e+06
Grenada	11000	11000	1	0	0	0	0	0	0	0	0
Guadeloupe	25000	20689.7	0.827586	2	2	4122.07	4122.07	1	0	0	4122.07
Guatemala	1965000	2.22735e+06	1.13351	2785	3157	5.75672e+06	6.51926e+06	1.13246	0.139683	911839	5.60742e+06
Guinea	1600000	2.43648e+06	1.5228	3336	5073	7.0498e+06	1.07114e+07	1.5194	0.34323	3.67634e+06	7.02468e+06
Guinea-Bissau	548000	722782	1.31894	134	177	281291	371446	1.32051	0.268156	90155.2	281291
Guyana	510000	517212	1.01414	68	69	144906	147040	1.01473	0.0144928	2133.95	144906
Haiti	1100000	1100000	1	769	769	1.56004e+06	1.56e+06	0.999975	0.00659631	10126.6	1.54784e+06
Honduras	1427000	1.43e+06	1.0021	3100	3107	6.42857e+06	6.44278e+06	1.00221	0.0208267	136463	6.30631e+06
Hungary	4803000	4.76644e+06	0.992388	5012	4974	7.30637e+06	7.25172e+06	0.992521	0	0	7.25172e+06
Iceland	7000	7000	1	0	0	0	0	0	0	0	0
India	169755000	1.69967e+08	1.00125	101067	101193	1.98996e+08	1.9942e+08	1.00213	0.0317875	6.38492e+06	1.93035e+08
Indonesia	33600000	4.31357e+07	1.2838	32689	41966	6.98746e+07	8.97234e+07	1.28406	0.239789	2.15768e+07	6.81466e+07
Iran	16926000	2.06338e+07	1.21906	3227	3439	5.53452e+06	5.94363e+06	1.07392	0.129673	812867	5.13076e+06
Iraq	5799000	6.2347e+06	1.07513	619	666	1.0742e+06	1.15404e+06	1.07432	0.129485	144546	1.0095e+06
Ireland	1079000	1.2578e+06	1.16571	65	76	83348.4	97636.5	1.17143	0.236842	23256.7	74379.9
Israel	424000	385633	0.909513	69	63	124508	114249	0.917608	0.911765	56556.1	9057.87
Italy	11284000	9.69206e+06	0.858921	6512	5593	1.0304e+07	8.80993e+06	0.855001	0	0	8.80993e+06
Jamaica	284000	284000	1	251	236	511123	480576	0.940234	0	0	480576
Japan	4830000	4.42389e+06	0.915918	3396	3110	5.71223e+06	5.21638e+06	0.913193	0	0	5.21638e+06
Jordan	278000	254460	0.915325	12	11	21702.9	19890.9	0.916506	0	0	19890.9
Kazakhstan	21671000	1.61526e+07	0.745356	39451	29405	5.34812e+07	3.97658e+07	0.743547	0	0	3.97658e+07
Kenya	5374000	6.45981e+06	1.20205	3658	4397	7.83746e+06	9.42075e+06	1.20201	0.176484	1.66044e+06	7.76031e+06
Kiribati	37000	37000	1	0	0	0	0	0	0	0	0
South Korea	1918000	1.65881e+06	0.864865	1878	1624	3.26375e+06	2.82251e+06	0.864806	0	0	2.82251e+06
Kuwait	12000	43200	3.6	1	1	1863.39	1863.39	1	0	0	1863.39
Kyrgyzstan	1423000	1.39135e+06	0.977758	2605	2547	4.1541e+06	4.06088e+06	0.977559	0	0	4.06088e+06
Laos	958000	1.20418e+06	1.25698	8041	8595	1.63142e+07	1.74562e+07	1.07	0.0681024	1.20972e+06	1.62465e+07
Latvia	982000	1.38181e+06	1.40714	3235	4552	3.79579e+06	5.33514e+06	1.40554	0.287407	1.53935e+06	3.79579e+06
Lebanon	332000	332359	1.00108	213	196	378532	348229	0.919946	0	1763.04	346466
Lesotho	334000	347526	1.0405	207	207	387434	387434	1	0	0	387434
Liberia	595000	616165	1.03557	3274	3390	6.97129e+06	7.21806e+06	1.0354	0.0357354	251026	6.96703e+06
Libya	2150000	2.08016e+06	0.967517	130	126	240236	233216	0.970782	0.0952381	21878.4	211338
Lithuania	2921000	1.39375e+06	0.477147	4050	1932	4.92268e+06	2.3403e+06	0.475411	0	0	2.3403e+06
Luxembourg	63000	60031.7	0.952885	47	45	64931.4	62150.8	0.957176	0.0952381	5547.02	56603.8
Macedonia	599000	638564	1.06605	798	816	1.27712e+06	1.30606e+06	1.02267	0.0356704	48093.9	1.25797e+06
Madagascar	3500000	3.73684e+06	1.06767	6433	6868	1.30768e+07	1.39624e+07	1.06772	0.0643138	897684	1.30647e+07
Malawi	2240000	3305125	1.4755	1712	2526	3.56577e+06	5.26143e+06	1.47554	0.334921	1.75999e+06	3.50144e+06
Malaysia	7605000	8.30223e+06	1.09168	5781	6311	1.23575e+07	1.34906e+07	1.0917	0.117733	1.55004e+06	1.19406e+07
Maldives	9000	14857.1	1.65079	2	0	4257.44	0	0	0	-4257.44	4257.44
Mali	4674000	5.18379e+06	1.10907	11767	13050	2.45054e+07	2.71858e+07	1.10938	0.102257	2.77025e+06	2.44156e+07
Malta	9000	10000	1.11111	0	0	0	0	0	0	0	0
Marshall Islands	9000	12222.2	1.35802	0	0	0	0	0	0	0	0
Martinique	21000	19000	0.904762	0	0	0	0	0	0	0	0
Mauritania	500000	630542	1.26108	1279	1613	2.63937e+06	3.32868e+06	1.26117	0.203369	689312	2.63937e+06
Mauritius	106000	106000	1	0	0	0	0	0	0	0	0
Mayotte	20000	21176.5	1.05882	9	9	18810.5	18810.5	1	0	0	18810.5
Mexico	27600000	2.89643e+07	1.04943	15580	16350	3.14064e+07	3.29051e+07	1.04772	0.0658225	2.11808e+06	3.0787e+07
Moldova	2162000	2.10656e+06	0.974356	2039	1987	2.96938e+06	2.89408e+06	0.974644	0	0	2.89408e+06
Mongolia	1176000	1.12844e+06	0.959554	17057	16367	2.42729e+07	2.32893e+07	0.959475	0	0	2.32893e+07
Morocco	9652000	9.60294e+06	0.994917	4506	4483	8.08655e+06	8.04888e+06	0.995341	0.0268097	216404	7.83247e+06
Mozambique	4135000	5.49626e+06	1.3292	4019	5342	8.19062e+06	1.09148e+07	1.3326	0.248362	2.73807e+06	8.17672e+06
Namibia	820000	826240	1.00761	795	801	1.61891e+06	1.63117e+06	1.00757	0.0171569	30625.2	1.60054e+06
Nepal	2429000	2.56733e+06	1.05695	2400	2537	4.54787e+06	4.80663e+06	1.0569	0.0857805	415282	4.39135e+06
Netherlands	944000	977232	1.0352	1146	1186	1.50603e+06	1.55639e+06	1.03344	0.129442	200079	1.35631e+06
New Caledonia	10000	10000	1	4	4	8009.89	8009.89	1	0	0	8009.89
New Zealand	3341000	3.53853e+06	1.05912	5317	5631	8.51726e+06	9.00677e+06	1.05747	0.0597631	521304	8.48547e+06
Nicaragua	2151000	2.59494e+06	1.20639	3198	3858	6.68854e+06	8.06453e+06	1.20572	0.183992	1.47024e+06	6.59011e+06
Niger	14500000	1.56733e+07	1.08092	1227	1326	2.5627e+06	2.76928e+06	1.08061	0.0801782	206585	2.5627e+06
Nigeria	30850000	3.69455e+07	1.19759	21249	25448	4.48284e+07	5.37065e+07	1.19805	0.174116	9.38538e+06	4.43211e+07
Niue	7000	7000	1	0	0	0	0	0	0	0	0
North Korea	2800000	3.40357e+06	1.21556	1392	1692	2.31135e+06	2.80851e+06	1.21509	0.188415	513830	2.29468e+06
Norway	884000	887069	1.00347	654	656	662720	665359	1.00398	0.0153139	12147.2	653212
Oman	80000	164706	2.05882	88	181	179900	366926	2.03961	0.58046	203261	163665
Pakistan	21950000	2.27658e+07	1.03717	15358	14817	2.84537e+07	2.74549e+07	0.964897	0.0162031	433281	2.70216e+07
Palau	6000	6000	1	17	17	36128.5	36128.5	1	0	0	36128.5
Occupied Palestinian Territory	226000	214142	0.947529	0	11	21714.7	19906.8	0.916744	0	0	19906.8
Panama	688000	731131	1.06269	1505	1599	3.19173e+06	3.39084e+06	1.06238	0.0695322	239330	3.15151e+06
Papua New Guinea	855000	985687	1.15285	3834	4420	8.1581e+06	9.40657e+06	1.15303	0.151421	1.28224e+06	8.12433e+06
Paraguay	3110000	6.07857e+06	1.95452	4115	8043	8.05269e+06	1.5714e+07	1.9514	0.49284	7.72308e+06	7.99092e+06
Peru	4285000	4.71131e+06	1.09949	2541	2794	5.3587e+06	5.89203e+06	1.09953	0.102326	605206	5.28682e+06
Philippines	10650000	1.09801e+07	1.03099	11682	11754	2.44931e+07	2.46472e+07	1.00629	0.0186779	444124	2.42031e+07
Poland	14330000	1.21766e+07	0.849725	16345	13889	2.1473e+07	1.82441e+07	0.84963	0	0	1.82441e+07
Portugal	2340000	1.43096e+06	0.61152	1397	854	2.3273e+06	1.43009e+06	0.614483	0.00117096	0	1.43009e+06
Puerto Rico	101700	99931.3	0.982609	72	42	146604	85511.4	0.583281	0	0	85511.4
Qatar	21000	40090.9	1.90909	0	0	0	0	0	0	0	0
Republic of South Africa	15712000	1.6952e+07	1.07892	13363	14418	2.55097e+07	2.75266e+07	1.07906	0.0796608	2.20556e+06	2.5321e+07
Congo	540000	555093	1.02795	478	491	1.02414e+06	1.05194e+06	1.02715	0.0265306	27803.6	1.02414e+06
Réunion	41000	32439	0.791196	0	0	0	0	0	0	0	0
Romania	9908000	9.66929e+06	0.975908	9059	8841	1.3566e+07	1.32426e+07	0.976163	0	0	1.32426e+07
Russia	126238000	1.18379e+08	0.937743	143788	134836	1.85025e+08	1.73168e+08	0.935913	0.000200236	0	1.73168e+08
Rwanda	1150000	1.72204e+06	1.49743	717	732	1.53617e+06	1.5683e+06	1.02091	0.0464481	72830.3	1.49547e+06
Saint Helena	4000	4000	1	0	0	0	0	0	0	0	0
Saint Kitts and Nevis	8000	6400	0.8	0	0	0	0	0	0	0	0
Saint Lucia	18000	18000	1	0	0	0	0	0	0	0	0
Saint Vincent and Grenadines	8000	8000	1	0	0	0	0	0	0	0	0
Samoa	90000	84705.9	0.941176	0	0	0	0	0	0	0	0
Samoa	90000	84705.9	0.941176	0	0	0	0	0	0	0	0
Sao Tomé and Príncipe	51000	66980.4	1.31334	0	0	0	0	0	0	0	0
Saudi Arabia	3785000	4.034e+06	1.06579	142	151	286811	301885	1.05256	0.362416	106608	195278
Senegal	2400000	2.65328e+06	1.10553	5546	6131	1.15041e+07	1.27196e+07	1.10566	0.099052	1.27569e+06	1.1444e+07
Serbia and Montenegro	3736000	3.99796e+06	1.07012	4505	4821	6.93723e+06	7.42712e+06	1.07062	0.0703642	527637	6.89948e+06
Seychelles	6000	6000	1	0	0	0	0	0	0	0	0
Sierra Leone	550000	735872	1.33795	2787	3230	5.90783e+06	6.84544e+06	1.1587	0.137164	952455	5.89298e+06
Slovakia	1575000	1.1327e+06	0.719175	1222	879	1.73757e+06	1.25255e+06	0.72086	0	0	1.25255e+06
Slovenia	204000	201010	0.985342	187	184	276533	272034	0.983729	0	0	272034
Solomon Islands	73000	86476.9	1.18462	2	2	4227.34	4227.34	1	0	0	4227.34
Somalia	1067000	1433792	1.34376	1841	2474	3.94483e+06	5.30097e+06	1.34378	0.25587	1.35614e+06	3.94483e+06
Spain	18304000	1.83328e+07	1.00157	14642	14665	2.40366e+07	2.40748e+07	1.00159	0.00900348	220585	2.38542e+07
Sri Lanka	1910000	1.92804e+06	1.00944	1668	1684	3.54343e+06	3.57737e+06	1.00958	0.0229529	89310.7	3.48806e+06
Sudan	16350000	2.48948e+07	1.52262	27767	42279	5.84388e+07	8.91339e+07	1.52525	0.344039	3.07825e+07	5.83514e+07
Suriname	67000	76268.7	1.13834	60	68	127950	145021	1.13342	0.227273	31999.4	113021
Swaziland	191000	194010	1.01576	0	0	0	0	0	0	0	0
Sweden	2709000	2.58444e+06	0.954021	2003	1911	2.26997e+06	2.16195e+06	0.95241	0.000526316	0	2.16195e+06
Switzerland	437000	435056	0.995551	63	63	92291	92291	1	0	0	92291
Syria	5352000	5.68341e+06	1.06192	955	1014	1.66364e+06	1.76572e+06	1.06135	0.128486	225612	1.54011e+06
Tajikistan	1058000	1.11731e+06	1.05606	1322	1396	2.21212e+06	2.33599e+06	1.05599	0.0581062	137293	2.19869e+06
Tanzania	10000000	11074500	1.10745	10905	12077	2.32484e+07	2.5736e+07	1.107	0.0977487	2.50254e+06	2.32334e+07
Thailand	19245000	1.66268e+07	0.863952	19720	17037	4.07467e+07	3.52251e+07	0.864491	0.000353774	0	3.52251e+07
Togo	2630000	2.83032e+06	1.07617	269	289	568921	611119	1.07417	0.155932	84806.7	526312
Tonga	26000	24266.7	0.933333	0	0	0	0	0	0	0	0
Trinidad and Tobago	122000	124033	1.01667	2	2	4215.53	4214.1	0.999661	0.5	2106.62	2107.48
Tunisia	4990000	5.02395e+06	1.0068	644	648	1.10709e+06	1.12104e+06	1.0126	0.108025	127193	993843
Turkey	26379000	2.58567e+07	0.980202	31700	31072	5.2738e+07	5.1692e+07	0.980167	6.5083e-05	0	5.1692e+07
Turkmenistan	1915000	3.24038e+06	1.6921	219	371	373850	618161	1.6535	0.414365	254330	363831
Turks & Caicos Islands	1000	1000	1	0	0	0	0	0	0	0	0
Tuvalu	2000	2000	1	0	0	0	0	0	0	0	0
Uganda	7160000	8.53408e+06	1.19191	5118	6100	1.09659e+07	1.30699e+07	1.19187	0.165195	2.16406e+06	1.09059e+07
Ukraine	33496000	3.30682e+07	0.987229	34545	34104	4.84975e+07	4.78649e+07	0.986956	0	0	4.78649e+07
United Arab Emirates	247000	609783	2.46876	5	5	9770.43	9770.43	1	0	0	9770.43
United Kingdom	5928000	5.47979e+06	0.924392	3857	3565	5.01418e+06	4.64051e+06	0.925478	0	0	4.64051e+06
United States	178068000	1.74531e+08	0.980136	114625	112349	1.86608e+08	1.82898e+08	0.980117	0.00290273	551294	1.82347e+08
Uruguay	1415000	1.40601e+06	0.993649	3561	3538	6.40684e+06	6.36624e+06	0.993663	0.00340136	19397.2	6.34685e+06
Uzbekistan	4825000	5.24378e+06	1.08679	1211	1316	1.95444e+06	2.12401e+06	1.08676	0.153439	313978	1.81003e+06
Vanuatu	105000	105000	1	7	7	14417.9	14417.9	1	0	0	14417.9
Venezuela	3405000	3.3936e+06	0.996651	7381	7356	1.56239e+07	1.55737e+07	0.996788	0.018873	304681	1.5269e+07
Vietnam	8138000	1.0736e+07	1.31925	12679	13093	2.59081e+07	2.67778e+07	1.03357	0.0400657	1.14819e+06	2.56296e+07
Virgin Islands	3000	2142.86	0.714286	0	0	0	0	0	0	0	0
Wallis and Futuna	6000	6000	1	0	0	0	0	0	0	0	0
Western Sahara	5000	6250	1.25	0	0	0	0	0	0	0	0
Yemen	1669000	1.69363e+06	1.01476	961	812	1.9965e+06	1.68645e+06	0.844703	0	0	1.68645e+06
Zambia	5287000	5.30808e+06	1.00399	3013	3025	6.25109e+06	6.27602e+06	1.00399	0.0134691	72604.3	6.20342e+06
Zimbabwe	3350000	3.72841e+06	1.11296	6293	7004	1.2781e+07	1.4222e+07	1.11275	0.102385	1.45521e+06	1.27668e+07
Global Total	1535740100	1.60825e+09	1.04721	1440772	1503154	2.53955e+09	2.68726e+09	1.05816		2.45521e+08	2.44163e+09
