# Supplementary material for: Projecting Global Land-Use Change and Its Effect on Ecosystem Service Provision and Biodiversity with Simple Models
Source: PLoS One. 2010 Dec 15;5(12):e14327. doi: 10.1371/journal.pone.0014327 (PMC3002265; doi:10.1371/journal.pone.0014327)
Supplement: Table S5 — Crop grid cell area growth rate for each region under the regional scenario. (0.03 MB XLS) [file pone.0014327.s012.xls]

## Sheet: Sheet1
Table S5. Crop grid cell area growth rate for each region under the regional scenario
Region	d00	c00	d15	lowc15	meanc15	highc15	c15	c15 / c00 (delta)
Canada	2.39831e+07	52178000	2.44051e+07	4.97805e+07	5.26e+07	5.30961e+07	4.97805e+07	0.954051
United States	8.93146e+07	178068000	8.7443e+07	1.56958e+08	1.65647e+08	1.74337e+08	1.56958e+08	0.88145
Australia	19296700	47600000	2.16168e+07	4.70898e+07	4.99201e+07	5.33232e+07	4.70898e+07	0.989281
New Zealand	143200	3341000	99000	1.86762e+06	2.08869e+06	2.30977e+06	2.08869e+06	0.62517
Mexico	1.02166e+07	27600000	1.00991e+07	2.38457e+07	2.55641e+07	2.72824e+07	2.55641e+07	0.926234
Korea	1249705	1918000	1.04246e+06	1.48844e+06	1.54419e+06	1.59993e+06	1.54419e+06	0.805103
Japan	2.13829e+06	4830000	1.82998e+06	3.67286e+06	3.90322e+06	4.13358e+06	3.67286e+06	0.760427
Turkey	14512004	26379000	1.46043e+07	2.52846e+07	2.64713e+07	2.65468e+07	2.64713e+07	1.0035
European Union-27	7.09701e+07	127764000	7.02126e+07	1.15163e+08	1.20782e+08	1.264e+08	1.15163e+08	0.901371
Russia	47929000	126238000	4.85286e+07	1.19007e+08	1.26838e+08	1.27817e+08	1.26838e+08	1.00475
Ukraine	15262000	33496000	2.09814e+07	3.7392e+07	3.92154e+07	4.60485e+07	3.92154e+07	1.17075
Algeria	1089100	8192000	3.02831e+06	9.42092e+06	1.01312e+07	2.27784e+07	1.01312e+07	1.23672
Egypt	2754691	3291000	3.08831e+06	3.57099e+06	3.62462e+06	3.68957e+06	3.62462e+06	1.10137
Sub Saharan Africa	67980038	161808000	8.06014e+07	1.65047e+08	1.74429e+08	1.9185e+08	1.9185e+08	1.18566
Republic of South Africa	5620845	15712000	4.93316e+06	1.20184e+07	1.29041e+07	1.37897e+07	1.29041e+07	0.821287
Argentina	2.29578e+07	28900000	3.07034e+07	3.60514e+07	3.66456e+07	3.86504e+07	3.66456e+07	1.26801
Brazil	32402733	65200000	4.65358e+07	7.60534e+07	7.93331e+07	9.36382e+07	9.36382e+07	1.43617
Chile	627600	2324000	578882	1.83065e+06	1.98712e+06	2.1436e+06	1.98712e+06	0.855045
Uruguay	533500	1415000	1.03646e+06	1.82981e+06	1.91796e+06	2.74899e+06	1.91796e+06	1.35545
Bangladesh	11956000	8484000	1.09386e+07	8.39737e+06	8.07972e+06	7.76206e+06	8.07972e+06	0.952348
China	1.01099e+08	148657000	9.41554e+07	1.29589e+08	1.34018e+08	1.38448e+08	1.38448e+08	0.931322
India	114682000	169755000	1.23065e+08	1.7263e+08	1.78138e+08	1.82163e+08	1.78138e+08	1.04938
Indonesia	16118001	33600000	1.61152e+07	3.00984e+07	3.18463e+07	3.35942e+07	3.35942e+07	0.999827
Iran	7187000	16926000	8.97189e+06	1.7737e+07	1.87109e+07	2.11296e+07	1.87109e+07	1.10545
Malaysia	726704	7605000	668013	5.72624e+06	6.35852e+06	6.99079e+06	6.99079e+06	0.919237
Pakistan	13041900	21950000	1.3461e+07	2.14782e+07	2.23691e+07	2.26553e+07	2.23691e+07	1.01909
Saudi Arabia	614000	3785000	382679	1.96375e+06	2.16139e+06	2.35902e+06	2.16139e+06	0.57104
Other CIS	20338621	37593400	2.49689e+07	4.04982e+07	4.22236e+07	4.61518e+07	4.22236e+07	1.12317
Other LCD	2.06175e+07	45552000	2.47294e+07	4.71704e+07	4.96638e+07	5.46366e+07	5.46366e+07	1.19943
Other OECD	682374	1328000	680983	1.19643e+06	1.26086e+06	1.32529e+06	1.19643e+06	0.900926
Rest of the World	6.0705e+07	118921700	6.65629e+07	1.18958e+08	1.2478e+08	1.30397e+08	1.30397e+08	1.0965
Global Total	7.96749e+08	1530411100	8.56068e+08	1.48281e+09	1.55516e+09	1.6598e+09	1.58403e+09	1.03503
