# Supplementary material for: Projecting Global Land-Use Change and Its Effect on Ecosystem Service Provision and Biodiversity with Simple Models
Source: PLoS One. 2010 Dec 15;5(12):e14327. doi: 10.1371/journal.pone.0014327 (PMC3002265; doi:10.1371/journal.pone.0014327)
Supplement: Table S10 — The average yield of each crop or crop group in 2000 by country (Mg ha−1). (0.07 MB XLS) [file pone.0014327.s017.xls]

## Sheet: Sheet1
Table S10. The average yield of each crop or crop group in 2000 by country (Mg per ha)
Country	Rice	Wheat	Coarse grains	Oil seeds	Vegetables & melons	Pulses	Roots and tubers	Fruit excl. melons	Other oil crops	Fiber crops	Treenuts	Other cereals	Other
Afghanistan	2	0.724	0.859042	1.3913	9.7388	1.3513	16.7857	6.5185	0.742987	0	1.6377	0.8148	6.69355
Albania	0	3.0455	3.4391	1.52173	22.6525	0.9092	14.1228	5.6872	1.10716	0	1.2	1.1538	6.44517
Algeria	1.5	0.9194	0.753048	1.80435	11.2276	0.3471	16.6142	4.821	1.28377	0	0.9754	1.1	1.6377
Andorra	0	0	0	0	0	0	0	0	0	0	0	0	0
Angola	1.3454	1.7391	0.5745	0.7333	5.6	0.3854	7.7139	8.2624	3.36295	1.03448	0.3928	0.5336	3.11095
Antigua and Barbuda	0	0	1.6	0	6.8801	0	4.3965	7.1353	0	0	0	0	0
Argentina	4.7798	2.4934	4.89357	2.16825	16.7767	1.1337	23.311	16.5611	1.72368	0.804876	2.5053	1.28628	34.8754
Armenia	0	1.7057	0.782464	0	18.2933	1.9085	8.4866	6.7485	0	0	0	0.9619	2.0857
Aruba	0	0	0	0	0	0	0	0	0	0	0	0	0
Australia	8.2573	1.8209	2.1451	1.22222	22.7651	0.9757	28.3595	13.163	3.63117	0	2.4633	1.95829	24.4604
Austria	0	4.4688	6.35226	2.37802	37.7498	2.3521	29.2627	16.2312	2.01728	0	2.847	3.90569	58.7905
Azerbaijan	5.0047	2.3222	2.29635	0.896794	12.4585	1.751	8.9357	8.0981	0.960807	0	1.2172	0.5	4.11848
Bahamas	0	0	1.95	0	8.2092	0.6764	3.8765	15.3871	0	0	0	0	25
Bahrain	0	0	0	0	10.729	1.0909	10.3333	14.7081	0	0	2.0294	0	0
Bangladesh	3.4836	2.2103	1.27537	0.7577	6.001	0.7724	11.6546	7.6257	1.15609	1.82234	0	0.7488	13.2424
Barbados	0	0	2.6086	0	10.8479	1.6444	13.7689	6.6511	2.92721	0	0	0	62.7586
Belarus	0	2.1371	1.84035	0.774967	15.6749	1.4696	13.1888	3.5973	0.2024	0.4536	2.4285	1.98823	27.9355
Belgium	0	7.9197	8.47875	2.9583	31.0139	3.9444	44.4057	44.2063	1.0802	1.1946	2.2727	6.19805	63.9439
Belize	2.7237	0	2.35222	2.0121	11.0923	1.0306	9.396	13.887	3.7251	0	2.2429	0	47.4779
Benin	2.1114	0	1.09098	0.8357	4.0113	0.7423	10.7073	5.9595	1.41398	0	0.2183	0.803098	3.59635
Bhutan	1.7038	0.9456	1.5446	0.6411	2.9321	1.0588	7.5517	6.5	0.3392	3.8888	0	0.727174	2.16314
Bolivia	1.9239	0.8874	1.83237	1.88936	4.6884	1.0096	7.5549	9.3093	0.575165	0	2.816	0.642098	30.944
Bosnia and Herzegovina	0	3.229	2.27341	1.19501	5.3533	0.8199	6.5465	2.4631	0	0	2.1415	2.6047	4.42
Botswana	0	1.6666	0.112419	1.0227	4.8988	0.5468	7.8571	4.5106	1.81542	0	0	0.631245	0
Brazil	3.0339	1.5588	2.65229	2.39562	17.316	0.6989	13.7095	15.2328	3.27962	1.01418	0.2702	1.05733	39.8217
Brunei	0.65	0	0	0	1.1752	0	4.3762	5.6888	1.69	0	0	0	0.0669571
Bulgaria	4.7	2.8421	2.01022	0.845663	9.1418	0.4586	7.5261	4.1125	0.808191	0	1.0052	1.48183	1.38818
Burkina Faso	2.5675	0	0.981635	0.8519	8.3603	0.5438	7.7802	5.5052	0.920741	0	0.413	0.643752	50.7625
Burma	3.3834	1.1666	1.7238	0.463367	11.8271	0.7106	9.2445	4.6229	0.703484	0.908258	0	0.631858	14.6852
Burundi	3.0398	0.6774	1.1038	0.75	10.909	0.8424	6.86	5.1217	1.44888	0	0	1.0451	5.12146
Cambodia	2.1154	0	2.7345	0.8452	6.2666	0.6595	8.1378	5.7677	1.93592	0.8653	1.625	0	3.66587
Cameroon	3.0102	1.3333	1.78349	0.6375	3.9333	1.028	8.9975	6.4177	2.70101	0.5263	0	1.0137	1.7614
Canada	0	2.4445	3.42822	1.6744	20.9654	1.886	28.682	11.1344	1.12275	1.2043	0	2.04056	21.6339
Cape Verde	0	0	0.7947	0	17.9473	0.1057	8.471	12.295	3.547	0	0	0	15.3608
Cayman Islands	0	0	0	0	4.2142	0	2.85	2.1234	0	0	0	0	0
Central African Republic	1.65	0	0.93802	0	8.0297	0.9687	3.7186	4.312	0.987866	0.321047	0	0.6966	2.58133
Chad	1.0341	1.4336	0.619165	0	10.326	0.5925	6.9319	4.0213	0.697768	0	0	0.406441	90.5854
Chile	5.2413	3.812	5.47757	2.22812	25.0322	1.4961	16.3156	13.4166	1.87417	0.987627	1.4092	2.069	42.3135
China	6.2641	3.7382	4.40429	1.59429	18.9544	1.3979	17.4575	7.0986	2.83578	2.1167	3.1344	1.72487	18.199
Christmas Island	0	0	0	0	0	0	0	0	0	0	0	0	0
Cocos (Keeling) Islands	0	0	0	0	0	0	0	0	0	0	0	0	0
Colombia	4.8027	2.1417	2.21499	2.0596	19.0152	1.053	13.1735	11.851	13.0241	1.076	2.96	0	29.2216
Comoros	1.2142	0	2.2288	0	6.8225	0.8103	5.0607	5.8246	2.77438	0	0	0	0.25298
Cook Islands	0	0	0	0	14.7704	0	20	10.8862	2.2727	0	0	0	0.454545
Costa Rica	3.8974	0	1.811	0	21.7656	0.5266	15.4058	29.1344	14.108	1	0.4555	0	25.1964
Côte d'Ivoire	1.8209	0	1.78947	1.2	3.7882	0.8199	7.9404	4.3121	3.17396	0	0.3922	0.643291	1.19938
Croatia	0	4.3743	3.79631	1.7272	7.985	1.7501	8.4883	5.349	1.07896	0	2.3941	2.60274	18.1159
Cuba	2.7624	0	2.1584	0	13.0285	1.0054	7.2592	9.8494	2.45393	1.04038	0	0	31.7428
Cyprus	0	1.626	0.837139	0	31.5888	1.089	18.1515	9.4623	2.95343	0	0.5562	0	3.09929
Czech Republic	0	4.2085	3.49442	2.56034	14.6274	2.0929	21.3299	11.6883	0.63973	1.7798	1.5034	3.38335	38.7866
Congo, Democratic Republic of	0.755	1.2849	0.79807	0.483	6.1108	0.5376	7.9691	5.9283	1.85589	0.7564	0	0.661	8.40692
Denmark	0	7.4797	5.3625	2.9591	22.6418	3.8222	42.4863	7.2787	0.531557	0	0	5.00521	56.4545
Djibouti	0	0	1.8333	0	6.1202	0.2705	0	0	0	0	0	0	0.8
Dominica	0	0	1.3076	0	9.025	0.4166	9.5578	6.6827	3.3043	0	0	0	1.79109
Dominican Republic	4.8422	0	1.05055	0	14.0492	0.7302	8.3929	10.5965	6.03018	0.4092	0.1727	0	11.1668
East Timor	3	0	1.6081	0.8	2.2168	0.7777	4.2964	11.0838	1	0	0	0	0.217904
Ecuador	3.6811	0.6208	1.31475	1.70535	4.4548	0.4841	4.7422	17.3204	10.0047	1.44135	0	0.514286	7.24794
Egypt	9.1024	6.3421	7.1264	3.56244	25.1038	2.9295	23.8398	16.7937	2.94467	1.01564	4.1612	2	79.7288
El Salvador	5.7883	0	2.07136	2.2727	15.1846	0.8624	17.2559	10.9927	3.88143	0.724276	0.7228	0	22.6724
Equatorial Guinea	0	0	0	0	0	0	2.8474	4.8113	6.83333	0.2777	0	0	0.170617
Eritrea	0	0.5944	0.431016	0	2.4545	0.5479	3.2051	10.8571	0.416412	0	0	0.246187	0.56
Estonia	0	2.1284	2.12708	1.3447	11.5598	1.706	15.2653	2.2791	0.8307	1.2153	0	2.02791	0
Ethiopia	1.8292	1.1631	1.31202	1.42086	3.4244	0.8834	7.9313	11.9573	0.508372	0.0835957	1.1666	0.813972	4.31895
Faroe Islands	0	0	0	0	0	0	13.6363	0	0	0	0	0	0
Micronesia	0	0	0	0	0	0	0	0	0	0	0	0	0
Fiji Islands	2.4976	0	2.46098	0	7.4766	0.975	10.2385	8.9969	3.16386	0	0	0	54.9942
Finland	0	3.6006	3.54318	1.3504	24.1546	2.25	24.385	2.2202	0	0	0	2.59717	32.4844
France	5.8358	7.117	7.67271	2.7658	18.7744	4.3989	39.5591	10.9407	0.72577	1.19358	2.192	4.84128	71.9828
French Guiana	2.2342	0	0.7073	0	17.7952	0	5.9061	6.32	3.6507	0	0	0	82.6666
French Polynesia	0	0	0	0	11.5544	0	12.1111	10.9459	4.2473	0	0	0	5.58928
Gabon	2	0	1.6187	1.0476	6.6098	0.6666	5.708	4.9637	2.34538	0	0	0	11.2806
Gambia	2.2142	0	1.40715	0	5.2941	0.25	3	4.6988	1.33232	0	0	1.09064	0
Georgia	0	1.0429	1.49615	0.397955	10.1934	0.3388	8.891	3.5381	1.4198	0	1.8638	0.193566	1.01065
Germany	0	7.2825	6.19668	3.30566	38.5951	2.9623	44.9908	14.4356	0.877093	0	3.0333	5.16374	58.7216
Ghana	2.1588	0	1.31424	0	4.5798	0.1	10.6879	7.4803	3.67366	0	0.4047	0.8144	0.401048
Greece	7	2.7115	6.49995	1.38888	29.7884	1.7973	20.7373	13.7712	3.18407	0	1.4507	1.98758	26.1865
Greenland	0	0	0	0	0	0	0	0	0	0	0	0	0
Grenada	0	0	1	0	9.6014	0.9834	5.3359	5.7255	2.6782	0	0	0	1.50408
Guadeloupe	0	0	0	0	14.6078	2.6	10.6312	18.3344	2.2333	0	0	0	68.3505
GUAM	0	0	2	0	25.2265	0	14.9038	8.6666	5.5779	0	2.5333	0	0
Guatemala	3.0763	2.0934	1.74034	3.0547	16.6447	0.8399	12.8658	26.1657	5.77604	0.972713	4.9783	0	30.5865
Guinea	1.7138	0	1.38024	0	3.0056	0.8461	6.2325	4.225	2.13436	0.1181	0.9	1.06856	4.27218
Guinea-Bissau	1.421	0	0.882406	0	5.102	0.6216	7.6984	3.942	3.92854	0	0.3463	0.747248	27.5
Guyana	3.8715	0	1.2351	0	7.5488	0.7146	8.2193	6.3007	4.35638	0	0	0	59.7786
Haiti	2.5	0	0.732927	0	5.8156	0.6577	3.8914	6.4357	1.02043	0.5428	0	0	9.93062
Honduras	2.2922	0.5	1.36518	2	13.9031	0.704	8.1882	14.9662	16.7003	0	1.25	0	15.1913
Hungary	3.4931	3.6044	3.79135	1.58783	16.6108	1.6583	18.4735	9.3038	1.41812	2.2241	1.084	2.20595	27.594
Iceland	0	0	0	0	61.6981	0	14.4537	0	0	0	0	0	0
India	2.8493	2.7784	1.22261	0.866318	13.23	0.704	18.9793	11.0263	1.08036	1.84965	0.7693	0.7744	37.1203
Indonesia	4.4007	0	2.7648	1.2334	7.8265	0.8523	11.9006	11.1463	9.95305	32.3027	0.1881	0	4.50551
Iran	3.6895	1.5856	2.0389	1.08328	20.8937	0.5529	21.6628	10.9366	1.88631	0	0.7897	0.8181	22.8846
Iraq	0.6	0.32	0.384719	1.31936	10.0509	0.7118	14.0645	9.0668	1.19961	0	1.3973	1	9.67011
Ireland	0	9.4538	7.21496	3.1851	36.4528	5.1333	33.7037	12.1313	0	0	0	2	56.7408
Isle of Man	0	0	0	0	0	0	0	0	0	0	0	0	0
Israel	0	1.4652	8.30944	1.5719	31.3456	2.923	34.4309	18.0538	3.53309	0	1.7965	0	0.1333
Italy	5.581	3.2132	7.53266	2.77739	27.2132	1.5364	24.8616	13.1178	2.47712	0.288173	1.4441	3.25559	38.4259
Jamaica	0.923	0	1.1487	0	14.7778	0.9993	15.8664	10.1521	3.23632	0.4615	0	0	40.1231
Japan	6.7022	3.7606	3.96897	1.91861	27.9781	1.8304	26.2921	16.459	2.4722	0	1.0113	0.763894	31.1394
Jordan	0	1.3971	2.1241	0	30.5142	1.1464	26.4293	10.3032	2.10082	0	3.4613	2.5437	0.8693
Kazakhstan	2.9722	0.9028	1.10862	0.409011	14.3325	1.238	10.6385	3.6986	1.39598	0	2	0.687138	10.8795
Kenya	3.7709	1.5491	1.39117	0.967742	10.8237	0.4155	7.0679	14.6866	0.863958	0.7548	5.6286	0.479	11.3407
Kiribati	0	0	0	0	14.4736	0	8.1132	5.8762	3.84	0	0.6666	0	0
Kuwait	0	2.2955	2.32795	0	47.4734	0	27.1996	7.8542	1	0	0	0	41.6666
Kyrgyzstan	3.0488	2.3419	3.76641	1.02578	15.7653	1.8686	15.1542	3.7627	1.81289	0	1.1025	1.93022	12.6651
Laos	3.0605	0	2.3877	0.8442	6.4304	0.967	6.9218	7.5058	1.26001	3	0	0	6.90154
Latvia	0	2.7035	1.93435	1.4492	10.4169	1.8571	14.5633	3.8977	0.582591	0.6875	0	2.15645	32.1023
Lebanon	0	2.7025	1.35478	2	31.3125	1.4131	21.3248	11.9669	3.38268	0	3.5078	0	20.6954
Lesotho	0	1.7196	0.69644	0	6.8965	0.9275	16.6666	4.3333	0	0	0	0	0
Liberia	1.278	0	0	0.4	4.4444	0.6363	6.791	5.2606	6.98493	0	0.88	0	2.13036
Libya	0	0.7575	0.498769	0	12.8477	1.3865	20	5.9649	1.30278	0	0.5	1.1538	2.2727
Lichtenstein	0	0	0	0	0	0	0	0	0	0	0	0	0
Lithuania	0	3.3412	2.37102	1.4594	15.1533	1.8387	16.3915	2.8151	0.34891	0.8372	0	2.25429	29.8412
Luxembourg	0	5.5768	5.10068	2.79	15.5733	2.8654	28.2629	9.5247	0	0	2.1428	5.97325	0
Macedonia	0	0	0	0	0	0	0	0	0	0	0	0	0
Madagascar	2.0511	2.25	0.879232	1	7.9282	0.9288	6.6149	5.3926	1.42058	1.05394	0.4094	0	5.94972
Malawi	1.6451	0.7967	1.70314	0.6112	8.4422	0.5637	13.4757	7.2408	0.755824	0.2	0.95	0.5694	13.5541
Malaysia	3.0639	0	2.4074	0	16.2709	0	9.2708	13.3043	16.9719	0	1.8571	0	1.81092
Maldives	0	0	0	0	14.4152	0.7777	4.0784	15.76	4.8968	0	5	0.8	0.526263
Mali	2.1052	2.3515	0.932239	1.6666	9.5939	0.4131	13.4823	5.3293	1.09417	0.65	0.6666	0.70823	35.5453
Malta	0	4.0134	3.9815	0	17.2792	2.6027	19.6124	6.7294	1.2	0	0	0	0
Marshall Islands	0	0	0	0	0	0	0	0	0.58	0	0	0	0
Martinique	0	0	0	0	17.6463	0.35	10.8655	32.3575	2.3	0	0	0	59.149
Mauritania	4.2373	1	0.560012	0	0.6454	0.429	2.2426	4.4464	0.672123	0	0	0.3033	0
Mauritius	0	0	8.9	0	15.5731	0	21.2068	16.8505	3.06259	0.8095	0	0	68.9191
Mayotte	0	0	0	0	0	0	0	0	0	0	0	0	0
Mexico	4.1804	4.9355	2.58391	1.45348	16.1242	0.7385	23.5717	12.3425	3.474	1.66465	1.2993	1.48536	30.2385
Moldova	0	1.9511	2.11953	1.17066	6.6047	0.584	5.0552	3.5655	0	0	1.7306	0.752495	11.2393
Mongolia	0	0.7768	0.694612	0	8.189	0.8	7.4726	2.1428	0	0	1.5333	0	0
Montserrat	0	0	1.875	0	3.0063	0	3.2	6.8269	0.9166	0	0	0	0
Morocco	4.5	0.4758	0.229405	0.50588	19.8872	0.2908	17.9997	9.4499	0.785887	0.88	0.5034	1.38319	32.3955
Mozambique	0.9815	0.8333	0.864419	0.5	5.5153	0.4767	5.8511	5.7035	1.09444	0.4722	1.1578	0.5863	10.2831
Northern Mariana Islands	0	0	0	0	0	0	0	0	0	0	0	0	0
Namibia	0	3.429	0.614333	0.304	5.5707	1.1016	8.5	5.4628	1.24969	0	0	0.2999	0
Nauru	0	0	0	0	7.5	0	0	6.875	5	0	0	0	0
Nepal	2.7027	1.7931	1.70638	0.8492	9.8004	0.7723	8.9924	9.3417	0.643496	1.044	3.82	1.0245	19.5698
Netherlands	0	8.3591	7.51289	3.625	50.039	4.3843	45.6548	29.6893	0.960861	1.8409	0	5.15869	61.1687
New Caledonia	0	2	3.76765	0	1.9224	0.6666	5.6971	2.1708	6	0	0	0	0.1285
New Zealand	0	6.2095	6.46376	2	20.5686	3.1707	39.7251	22.2881	2	0.5	0	2.8571	2.1142
Nicaragua	3.12	0	1.32973	1.9867	2.5099	0.7779	10.1234	8.0779	3.47903	0.82	0	0	22.3124
Niger	2.7478	1.8243	0.173224	0	13.6025	0.1132	21.3826	5.0612	0.300993	0	0	0.326029	12.7417
Nigeria	1.4997	1.4038	1.17654	0.8297	5.7696	0.5941	8.6093	5.3954	1.90435	0.9	1.8011	1.0393	0.850555
Niue	0	0	0	0	6.6666	0	6.2065	0.8923	0.8	0	0	0	0
Norfolk Island	0	0	0	0	0	0	0	0	0	0	0	0	0
North Korea	3.1588	0.8474	2.00173	1.129	12.3213	0.8529	10.2369	8.2317	1.8421	0.6944	1.4166	1.69355	1.34988
Norway	0	4.6025	3.75131	1.572	26.9893	0	20.627	6.0791	0	0	0	4.19447	0
Oman	0	3.1896	4.0909	0	19.0191	0	26.1031	8.0538	0	0	0	1.3333	4.8148
Pakistan	3.0311	2.4906	1.39256	1.01685	13.6165	0.5975	16.8827	8.3991	1.80446	0.696391	3.6077	0.5107	40.0936
Palau	0	0	0	0	0	0	0	0	0	0	0	0	0
Panama	2.4228	0	1.52298	0.7692	12.0214	0.4114	9.9124	27.5378	7.43114	0	0	0	29.3872
Papua New Guinea	2	0	4.41663	0	12.3965	0.5	7.4467	11.1249	6.8408	0	0.5612	0	2.51315
Paraguay	3.8491	1.381	1.90391	2.45491	6.6055	0.7045	13.1017	11.2221	1.69448	0	0	0	23.2513
Peru	6.59	1.2797	2.11113	1.4542	10.3042	1.0253	10.5671	11.2954	3.10309	1.7	2.2106	0.956267	22.1301
Philippines	3.0681	0	1.797	1.2312	8.5268	0.7248	6.8209	11.8626	4.15386	0.739374	0.6779	0	36.9575
Pitcairn Islands	0	0	0	0	0	0	0	0	0	0	0	0	0
Poland	0	3.2267	2.63344	2.1937	23.9533	1.8717	19.3762	5.7488	0.837249	1.90644	2.7333	2.07592	36.0786
Portugal	5.9772	1.5687	3.94186	0.551	26.8165	0.5866	12.6777	4.5625	0.704249	0	0.8944	1.26617	25.5642
Puerto Rico	0	0	1.7307	0	9.0168	3.6242	5.3651	12.8913	5.7422	0	0	0	2.25802
Qatar	0	2.3055	3.89231	0	16.8996	0	8.6666	7.2189	0	0	0	6	10
Republic of South Africa	2.3076	2.5996	2.83119	1.46948	16.5685	1.0793	25.6547	17.0408	1.47273	0.9714	3	0.590221	50.1439
Congo	0.6998	0	0.7999	0	7.8977	0.7724	8.8329	7.2916	2.19988	0	0	0.6666	13.7602
Réunion	2	0	7.8	0	8.7491	0.7586	23.8095	8.0652	1.49671	6.0465	0	0	73.6627
Romania	2.5714	2.3108	1.62633	0.81584	11.9238	0.8943	12.2737	5.7926	0.368962	2.55556	14.7306	1.58817	7.16371
Russia	3.4949	1.6141	1.62553	0.903111	14.3019	1.4709	10.523	4.141	0.449613	0.788663	1.3319	1.20719	18.2599
Rwanda	2.7318	0.6416	0.826599	0.4712	5.3747	0.6351	6.8068	6.1478	0.5223	0	0	0.8	1.80974
Saint Helena	0	0	0	0	0	0	0	0	0	0	0	0	0
Saint Kitts and Nevis	0	0	0	0	21.9	1	2.7835	6.5	4.45887	0	0	0	55.6357
Saint Lucia	0	0	0	0	7.1428	2	4.1421	9.8125	4	0	0	0	0.717601
Saint Vincent & Grenadi	0	0	0	0	0	0	0	0	0	0	0	0	0
Samoa	0	0	0	0	0.9787	0	5.1948	5.3993	6.45619	0	0	0	0.307669
San Marino	0	0	0	0	0	0	0	0	0	0	0	0	0
Sao Tomé and Príncipe	0	0	0	0	0	0	0	0	0	0	0	0	0
Saudi Arabia	0	4.2639	1.94833	0	19.4495	1.8604	26.2034	6.1466	2.20895	0	0	1.298	0
Senegal	2.3453	0	0.941669	0	14.7134	0.3236	5.66	7.2417	1.01673	0	0.3518	0.712155	102.12
Serbia and Montenegro	0	3.1501	2.40482	1.69605	7.1403	1.682	6.61	4.2185	0.703464	0.4109	1.7881	1.42751	18.4939
Seychelles	0	0	0	0	7.5781	0	5	5.3687	4.5714	0	0	0	0.162934
Sierra Leone	1.0868	0	1.07473	0	6.4518	0.6732	4.6705	4.8775	4.17409	0	0	0.945237	2.03955
Slovakia	0	3.0951	2.36052	1.53701	11.4437	1.255	15.4742	7.3177	0.608884	0.7264	1	2.03117	29.141
Slovenia	0	4.2492	5.26427	2.29883	27.2488	1.913	20.795	14.9056	2.1228	0	32.2258	2.63448	34.5354
Solomon Islands	4	0	0	0	16.6666	1.2962	16.7839	12.0642	8.60864	0	1	0	0.418994
Somalia	5.7142	0.3653	0.732341	0	6.1266	0.2631	10	9.3182	0.517717	0	0	0	34.124
South Korea	6.7109	2.5451	3.43506	1.31793	27.9797	1.0025	23.0336	14.5254	0.805463	1.8785	2.4629	1.15891	2.68689
Spain	7.066	3.0996	3.86547	1.11662	31.1691	0.8503	25.8167	8.8004	2.17816	0.907322	0.3931	2.13539	35.4367
Sri Lanka	3.4373	0	1.08195	0.9275	7.3957	0.919	8.4293	8.0431	5.11274	0	0.1999	0.7373	3.31017
Sudan	1.4652	2.3265	0.595439	0.7324	11.0598	1.5883	5.3543	8.724	0.378239	0	0	0.2376	69.9386
Suriname	3.897	0	1.9047	0.7352	16.2394	0.7272	13.0766	16.064	5.38808	0	0	0	35.6539
Swaziland	3.4	1.5	1.63056	0	9.1452	0.4433	4.9351	8.0867	0.455578	0	0.9722	0	105.867
Sweden	0	5.9066	3.89529	2.5224	16.0668	2.3881	29.7875	6.8342	0.741	0	0	3.97374	46.9
Switzerland	0	6.1322	7.26135	3.09547	29.4682	3.5271	42.4452	29.2944	0	0	1.768	6.3725	76.4758
Syria	0	1.8498	0.294269	2.03384	18.4183	0.6429	21.278	9.8178	2.58837	0	2.2434	0.6857	15.7119
Tajikistan	4.1153	1.1838	1.16457	0.265396	10.7699	0.4999	11.9046	2.7266	1.39986	0	0.9104	0.612878	1.9295
Tanzania	1.5134	1.3009	0.616887	0.343548	6.6416	0.5652	6.4696	3.26	0.850679	0.4837	1.325	0.866899	6.52579
Thailand	2.6128	0.6666	3.54013	1.28191	8.8512	0.8414	16.783	9.7837	6.90487	4.94097	1.0897	2.01538	19.6375
Togo	1.9222	0	1.09108	0	4.9629	0.3136	6.4839	6.2717	1.27623	0	1.1538	0.490446	0.325903
Tokelau	0	0	0	0	0	0	18.75	12.2	5	0	0	0	0
Tonga	0	0	0	0	3.7439	0	11.6443	2.8479	6.09218	0	0	0	1.04492
Trinidad and Tobago	2.9097	0	2.4375	0	11.6827	2.4495	9.3233	6.2538	5.4588	0	0	0	31.3125
Tunisia	0	1.1727	0.632764	0.739844	16.1458	0.6733	14.0096	5.1201	0.400737	0	0.2759	0.844624	2.0456
Turkey	6.0344	2.2349	2.44691	1.51625	24.1466	0.8536	26.1858	10.6121	3.0781	0	1.5425	1.74149	24.3052
Turkmenistan	0.39	2.4142	0.6127	0	11.249	2	5.9333	4.2135	1.7928	0	0.8333	0	9.88216
Turks & Caicos Is.	0	0	0	0	0	0	0	0	0	0	0	0	0
Tuvalu	0	0	0	0	7.6	0	0	11.8181	0.8333	0	0	0	0
Uganda	1.5138	1.7142	1.6028	1.07563	6.0403	0.6679	7.6582	5.7972	0.470405	0	0	1.3906	4.53131
Ukraine	3.5595	1.9755	2.12648	1.1944	9.6618	1.7521	12.1631	4.1592	0.442599	0.451666	3.0578	1.22421	17.499
United Arab Emirates	0	6.5	0	0	76.1868	0	18.135	4.2423	0	0	8.6585	0	12.6923
United Kingdom	0	8.0076	5.76554	2.8781	21.1451	3.8246	39.9759	11.8824	0.581	1.5555	0	6.07139	51.8065
United States	7.0367	2.8256	7.68889	2.50372	26.9553	1.8632	40.9616	25.1743	1.88026	0	2.7193	1.42652	53.1285
Uruguay	6.3839	2.5343	2.08303	0.678465	9.0448	0.9817	11.409	12.6701	1.21008	0	0	0.8928	41.9559
Uzbekistan	1.1745	2.6051	1.86045	1.5217	18.5575	2.1315	14.0057	5.9495	2.02828	10	2.183	3.09087	5.22094
Vanuatu	0	0	0.5384	0	15.1515	0	7.9591	12.6397	3.33327	0	0	0	0.557236
Venezuela	4.8969	0.3692	2.95183	1.53038	18.6013	0.8142	13.2115	15.0378	4.7911	1.073	0	0	21.3979
Vietnam	4.2431	0	2.747	1.203	11.4666	0.7102	7.5271	9.7067	2.73727	4.91211	1.3856	0.9473	11.8455
Virgin Islands	0	0	0	0	0	0	0	0	0	0	0	0	0
Wallis and Futuna	0	0	0	0	0	0	0	0	0	0	0	0	0
Occupied Palestinian Territory	0	2.4655	1.51475	2	30.2791	1.0167	30.2912	12.4274	0.425383	0	0.7038	3.2608	4.14623
Western Sahara	0	0	0	0	0	0	0	0	0	0	0	0	0
Yemen	0	1.6246	1.08417	0	11.6992	1.226	12.3736	7.1202	0.785932	0	0.7222	0.6319	0.592245
Zambia	1.1332	6.2101	1.70634	0.89827	6.9817	0.4571	5.1724	6.3567	0.608679	0	0	0.7172	45.883
Zimbabwe	2	5.3908	1.40484	1.77174	6.9199	0.7636	4.88	5.6732	0.802196	0.6666	0.94	0.292125	28.2505
