# Supplementary material for: Projecting Global Land-Use Change and Its Effect on Ecosystem Service Provision and Biodiversity with Simple Models
Source: PLoS One. 2010 Dec 15;5(12):e14327. doi: 10.1371/journal.pone.0014327 (PMC3002265; doi:10.1371/journal.pone.0014327)
Supplement: Table S17 — Alternative 2015 crop mix by country: q = 4 (“Mean” 2015 harvested hectare mix). (0.07 MB XLS) [file pone.0014327.s024.xls]

## Sheet: Sheet1
Table S17. Alternative 2015 crop mix by country: q = 4 ("High" 2015 Harvested Hectare Mix)
Country	Rice	Wheat	Coarse grains	Oil seeds	Vegetables & melons	Pulses	Roots and tubers	Fruit excl. melons	Other oil crops	Fiber crops	Treenuts	Other cereals	Other
Afghanistan	0.0473045	0.720038	0.0846379	0.0037766	0.0250689	0.013844	0.00523827	0.0360356	0.0468825	0	0.00475186	0.0101024	0.00231981
Albania	0	0.37155	0.182068	0.0105033	0.0863437	0.0955869	0.0359634	0.0768923	0.105366	0	0.00788671	0.00410109	0.023739
Algeria	3.74612e-05	0.397715	0.150134	0.00299958	0.118124	0.0325738	0.0374236	0.152505	0.0886551	0	0.0139778	5.14838e-06	0.00584856
American Samoa	0	0	0	0	0.0413204	0	0.336025	0.0902398	0.522441	0	0	0	0.00997388
Andorra	0	0	0	0	0	0	0	0	0	0	0	0	0
Angola	0.00231608	0.00158369	0.337436	0.00674428	0.0236087	0.0968508	0.301774	0.0268891	0.0454982	0.000720687	0.00139167	0.0980288	0.0571579
Antigua and Barbuda	0	0	0.0112014	0	0.154093	0	0.0243526	0.55843	0.251923	0	0	0	0
Argentina	0.00885812	0.190686	0.133884	0.570399	0.0071373	0.0115663	0.00446816	0.016978	0.0281504	0.000160697	0.000146587	0.00634616	0.0212195
Armenia	0	0.434029	0.160549	0	0.0963815	0.00832698	0.140711	0.148964	0	0	0	0.000431983	0.0106062
Aruba	0	0	0	0	0	0	0	0	0	0	0	0	0
Australia	0.00350678	0.488784	0.230748	0.0595284	0.00354608	0.0932198	0.00178111	0.00981242	0.0212457	0	0.000881084	0.0197526	0.0671944
Austria	0	0.253567	0.366871	0.107358	0.0116691	0.0389018	0.0209618	0.0594097	0.0166868	0	0.00529852	0.080821	0.0384558
Azerbaijan	0.00474162	0.503818	0.112775	0.0124023	0.0858067	0.00748733	0.0538634	0.0707951	0.109465	0	0.0226252	1.8472e-05	0.016201
Bahamas	0	0	0.0197415	0	0.338824	0.0235873	0.0337159	0.23726	0	0	0	0	0.346871
Bahrain	0	0	0	0	0.388868	0.00408163	0.00111317	0.542857	0	0	0.0630798	0	0
Bangladesh	0.767246	0.0305335	0.0019113	0.0250191	0.0207871	0.0343236	0.0196665	0.012355	0.0155287	0.0313201	0	0.0018027	0.0395063
Barbados	0	0	0.00857196	0	0.0958906	0.0565788	0.0275769	0.0360428	0.0461012	0	0	0	0.729238
Belarus	0	0.121378	0.218474	0.0892598	0.0239236	0.0536452	0.179088	0.0226773	0.0222167	0.0222167	0.00170689	0.231108	0.0143054
Belgium	0	0.359207	0.144423	0.0112286	0.086489	0.0031046	0.11349	0.0306752	0.0236295	0.0233897	0.000379451	0.0182826	0.185702
Belize	0.0441404	0	0.17937	0.00444318	0.0121652	0.114103	0.00444185	0.342697	0.00376809	0	0.00400516	0	0.290867
Benin	0.0111793	0	0.362349	0.00205326	0.0372614	0.0616873	0.17162	0.0145251	0.22719	0	0.0827089	0.0211246	0.00830181
Bermuda	0	0	0	0	0.748485	0	0.190909	0.0606061	0	0	0	0	0
Bhutan	0.221313	0.0381862	0.292483	0.00691387	0.014328	0.022319	0.0507649	0.0910267	0.0437628	0.000787731	0	0.0968909	0.121223
Bolivia	0.0644633	0.0506064	0.162353	0.42116	0.0441022	0.0132363	0.0843984	0.0438609	0.0416954	0	0.01024	0.0157881	0.0480958
Bosnia and Herzegovina	0	0.190386	0.396276	0.012716	0.218763	0.0252414	0.0760774	0.0556456	0	0	0.00443564	0.00782935	0.0126303
Botswana	0	0.00171136	0.747848	0.0163898	0.0142473	0.131767	0.0461183	0.00967662	0.00959426	0	0	0.0226474	0
Brazil	0.0382933	0.0153972	0.186434	0.372607	0.00815547	0.0854659	0.0379201	0.0474645	0.0280984	0.00390421	0.0128128	0.00104924	0.162398
British Virgin Islands	0	0	0	0	0	0	0	1	0	0	0	0	0
Brunei	0.0260673	0	0	0	0.686372	0	0.0293074	0.057454	0.00580344	0	0	0	0.194995
Bulgaria	0.00118524	0.324837	0.242238	0.243704	0.0530857	0.013765	0.0179408	0.0610805	0.00863074	0	0.00280456	0.0131224	0.0176055
Burkina Faso	0.0123005	0	0.409158	0.00104146	0.00783224	0.0906429	0.00318172	0.00374819	0.140721	0	0.00324579	0.325871	0.00225794
Burundi	0.0172889	0.0116819	0.150027	0.000339025	0.0206124	0.243601	0.199191	0.292321	0.015745	0	0	0.00777649	0.0414168
Cambodia	0.833218	0	0.0265711	0.0131401	0.0337634	0.0103068	0.0111712	0.0251091	0.0181156	9.36371e-05	0.000720285	0	0.0277913
Cameroon	0.00625655	0.000117695	0.182281	0.00236116	0.0917764	0.0700852	0.111235	0.0879922	0.164084	5.38052e-05	0	0.0144425	0.269315
Canada	0	0.33937	0.227128	0.287441	0.00393431	0.0847123	0.00572685	0.00259722	0.0289004	0.00165433	0	0.0170827	0.00145293
Cape Verde	0	0	0.425007	0	0.0120039	0.491387	0.016988	0.0171284	0.0238674	0	0	0	0.0136185
Cayman Islands	0	0	0	0	0.133333	0	0.0952381	0.771429	0	0	0	0	0
Central African Republic	0.0186153	0	0.173146	0	0.00988556	0.0391993	0.344696	0.0737191	0.274783	0.00156797	0	0.0146997	0.0496875
Chad	0.0335717	0.000896959	0.251203	0	0.00317683	0.0548021	0.0305494	0.00970315	0.29285	0	0	0.321987	0.00125865
Channel Islands	0	0	0	0	0	0	0	0	0	0	0	0	0
Chile	0.0189562	0.213866	0.237355	0.025413	0.0822486	0.0493344	0.0491074	0.232861	0.00583467	0.0131564	0.0111399	0.000931809	0.0597959
China	0.191363	0.133393	0.183175	0.117655	0.108113	0.0209376	0.0677857	0.0566198	0.0696377	0.00163722	0.00197688	0.01966	0.028046
Colombia	0.124937	0.0056097	0.155061	0.00714814	0.0254392	0.0320575	0.101923	0.173462	0.055548	0.00483582	3.36063e-05	0	0.313945
Comoros	0.15553	0	0.0171976	0	0.00963076	0.167847	0.145997	0.110022	0.276334	0	0	0	0.117442
Congo	0.00793816	0	0.0308898	0	0.0450474	0.042093	0.394392	0.119481	0.21613	0	0	0.0118018	0.132227
Congo, Democratic Republic of	0.0807088	0.00168159	0.245047	0.00353829	0.0116147	0.0592134	0.344809	0.0680309	0.140594	0.00126301	0	0.00862605	0.034873
Cook Islands	0	0	0	0	0.0396748	0	0.104065	0.137236	0.715447	0	0	0	0.00357724
Costa Rica	0.137345	0	0.0186934	0	0.0322355	0.0634318	0.0516681	0.271777	0.091484	0.00226344	0.00718127	0	0.323921
Côte d'Ivoire	0.059785	0	0.0545327	0.000364785	0.0246626	0.00564352	0.135669	0.087795	0.0951426	0	0.0283831	0.0130421	0.49498
Croatia	0	0.235848	0.385051	0.118457	0.0485281	0.00733943	0.0620083	0.0960391	0.0143253	0	0.00322247	0.00318064	0.0260012
Cuba	0.0881509	0	0.0508144	0	0.0839924	0.0476947	0.0764919	0.108844	0.0165737	0.00938357	0	0	0.518055
Cyprus	0	0.0578826	0.407967	0	0.0418538	0.0075695	0.0635607	0.288036	0.0720644	0	0.0372215	0	0.0238449
Czech Republic	0	0.394228	0.230022	0.200859	0.0130667	0.0168793	0.0287638	0.0197803	0.0232711	0.00352658	0.0017874	0.0376364	0.03018
Denmark	0	0.352409	0.421891	0.0774098	0.0058162	0.0207931	0.0222534	0.00432494	0.00290264	0	0	0.0581522	0.0340478
Djibouti	0	0	0.000464931	0	0.31358	0.666357	0	0	0	0	0	0	0.0195987
Dominica	0	0	0.00561008	0	0.0348432	0.00873506	0.142673	0.501781	0.167422	0	0	0	0.138936
Dominican Republic	0.14029	0	0.0291032	0	0.040445	0.0754398	0.0357593	0.118704	0.0585897	0.000777766	0.0065811	0	0.49431
Ecuador	0.133913	0.0088888	0.177653	0.0324214	0.0309521	0.0283863	0.0282814	0.179339	0.0559003	0.00753231	0	0.000566948	0.316165
Egypt	0.126782	0.251881	0.211389	0.0039008	0.129423	0.0312033	0.0186361	0.089213	0.0795851	0.00343054	0.00140018	0.00279605	0.0503599
El Salvador	0.0112499	0	0.443735	0.00224962	0.0147635	0.111651	0.00704267	0.0350226	0.0316602	0.010172	0.0049447	0	0.327509
Equatorial Guinea	0	0	0	0	0	0	0.324492	0.0937224	0.0530504	0.0159151	0	0	0.512821
Eritrea	0	0.0657143	0.430919	0	0.022508	0.167957	0.0798011	0.000716164	0.105556	0	0	0.124271	0.00255773
Estonia	0	0.166681	0.504759	0.0966639	0.0127922	0.00962445	0.076412	0.0287942	0.000160737	0.000160737	0	0.103952	0
Ethiopia	0.000813658	0.134495	0.325201	0.00226419	0.0225917	0.103065	0.0542087	0.00521966	0.0414125	0.0212538	0.00548486	0.229904	0.0540857
Faroe Islands	0	0	0	0	0	0	1	0	0	0	0	0	0
Fiji Islands	0.0372257	0	0.00263602	0	0.01934	0.00578392	0.0566463	0.0143947	0.390415	0	0	0	0.473559
Finland	0	0.115429	0.707969	0.0562547	0.00797857	0.00410819	0.0254392	0.00658258	0	0	0	0.0507993	0.0254392
France	0.00136842	0.361498	0.227975	0.190454	0.0336069	0.0331717	0.0114627	0.072576	0.00666678	0.00444999	0.00173254	0.0243255	0.0307122
French Guiana	0.598139	0	0.00254405	0	0.0873839	0	0.153801	0.149469	0.00395488	0	0	0	0.00470819
French Polynesia	0	0	0	0	0.0283714	0	0.0409203	0.0403746	0.863872	0	0	0	0.0264618
Gabon	0.00264435	0	0.0770556	0.00925593	0.0260864	0.00146169	0.380527	0.288587	0.107191	0	0	0	0.107191
Gambia	0.0588007	0	0.11613	0	0.00597994	0.0351761	0.00879403	0.00316585	0.46557	0	0	0.306384	0
Georgia	0	0.149667	0.301172	0.0618883	0.0750379	0.0140377	0.0598429	0.248905	0.000889575	0	0.0295938	0.00292063	0.056045
Germany	0	0.295463	0.253652	0.152507	0.0102355	0.0161873	0.0309948	0.0401857	0.0111096	0	0.000610977	0.140654	0.0483996
Ghana	0.0238161	0	0.185139	0	0.0265511	0.0285691	0.234956	0.0607359	0.0874213	0	0.00399967	0.0396158	0.309196
Greece	0.00616431	0.26442	0.11201	0.0107803	0.0456403	0.00791182	0.0154237	0.094857	0.377121	0	0.0221262	0.00510969	0.0384362
Grenada	0	0	0.0184639	0	0.019102	0.041872	0.0525304	0.201747	0.168872	0	0	0	0.497412
Guadeloupe	0	0	0	0	0.0790085	0.00129099	0.075738	0.335098	0.00516396	0	0	0	0.503701
Guam	0	0	0.000902911	0	0.0183777	0	0.0105596	0.0213222	0.944269	0	0.00456904	0	0
Guatemala	0.00933157	0.00311056	0.367382	0.00922262	0.0369845	0.097971	0.0119685	0.0445648	0.0559221	0.000357558	0.00300349	0	0.360181
Guinea	0.289202	0	0.103535	0	0.0637624	0.0260173	0.072575	0.0937423	0.20971	0.000440293	0.000600399	0.111917	0.0284989
Guinea-Bissau	0.17818	0	0.115197	0	0.0107749	0.00813613	0.0277068	0.0409995	0.0831204	0	0.46178	0.0736649	0.000439791
Guyana	0.533194	0	0.0129743	0	0.0466266	0.008048	0.0431109	0.0541993	0.0884809	0	0	0	0.213366
Haiti	0.0446756	0	0.372422	0	0.0343378	0.100269	0.174653	0.142536	0.0474398	0.00927594	0	0	0.0743922
Honduras	0.0033498	0.00227747	0.421982	0.00235134	0.0226398	0.13071	0.00474626	0.0714603	0.041588	0	0.00129946	0	0.297596
Hungary	0.000856057	0.272216	0.401455	0.161115	0.0245628	0.00893586	0.0127092	0.0503141	0.00317683	1.577e-05	0.00244978	0.0421743	0.0200194
Iceland	0	0	0	0	0.0722071	0	0.927793	0	0	0	0	0	0
India	0.239264	0.152859	0.0863027	0.105545	0.0304727	0.108618	0.0093561	0.0211957	0.118444	0.00566999	0.00399454	0.0725743	0.045704
Indonesia	0.376014	0	0.111359	0.0143889	0.0278257	0.0106234	0.0503402	0.0234963	0.171003	0.000215423	0.0238722	0	0.190863
Iran	0.0461129	0.455709	0.132935	0.0131437	0.0495877	0.091661	0.0152416	0.101405	0.0269552	0	0.0394026	0.00099287	0.026854
Iraq	0.0302543	0.390983	0.326873	0.0224706	0.106383	0.0328155	0.0120062	0.059433	0.0142277	0	0.000920216	0.00123935	0.00239504
Ireland	0	0.237085	0.578691	0.0113893	0.0189128	0.00466523	0.041987	0.00639136	0	0	0	0.00062203	0.100256
Isle of Man	0	0	0	0	0	0	0	0	0	0	0	0	0
Israel	0	0.243875	0.0343822	0.0595901	0.185296	0.0356449	0.0419605	0.253184	0.128636	0	0.0120094	0	0.00542265
Italy	0.0254612	0.268437	0.175116	0.0811423	0.0712144	0.00928214	0.00983377	0.162163	0.134759	0.000363969	0.0225228	0.00110692	0.038598
Jamaica	7.14455e-05	0	0.00770781	0	0.0675229	0.0167273	0.0746933	0.242755	0.300456	0.0036584	0	0	0.286408
Japan	0.502812	0.0761494	0.018343	0.0503918	0.138528	0.0173324	0.0518146	0.0706147	0.00328518	0	0.00803044	0.0114677	0.0512306
Jordan	0	0.11999	0.082116	0	0.183184	0.0219132	0.0230226	0.145231	0.401301	0	0.00300241	0.00100289	0.0192367
Kazakhstan	0.00567419	0.757215	0.111992	0.0569122	0.0104843	0.00159636	0.0120943	0.00541546	0.0191183	0	5.3212e-05	0.0174003	0.00204486
Kenya	0.00359116	0.0435272	0.387794	0.00334169	0.0342953	0.274318	0.0553951	0.034858	0.043804	0.00524313	0.00102241	0.0221999	0.0906104
Kiribati	0	0	0	0	0.0137135	0	0.0382533	0.0350054	0.902201	0	0.0108264	0	0
North Korea	0.193265	0.0229531	0.180778	0.166017	0.114426	0.125784	0.0780599	0.0606722	0.00702909	0.00665914	0.00355154	0.022937	0.0178687
South Korea	0.496541	0.00229754	0.048888	0.0493971	0.209517	0.0100493	0.0218312	0.0866005	0.0378482	6.70787e-05	0.0208183	0.00314311	0.0130013
Kuwait	0	0.0244029	0.137705	0	0.530816	0	0.0964722	0.208999	0.000729744	0	0	0	0.000875693
Kyrgyzstan	0.0069	0.470531	0.108849	0.114493	0.0551508	0.0105927	0.0738218	0.0533575	0.0597591	0	0.00522575	0.000368071	0.0409511
Laos	0.689628	0	0.049664	0.00553715	0.105967	0.0148847	0.0315438	0.0251364	0.0246436	0.000492871	0	0	0.0525026
Latvia	0	0.312335	0.332738	0.018919	0.0206285	0.00424538	0.103709	0.0280033	0.0046497	0.00323457	0	0.145863	0.0256744
Lebanon	0	0.163559	0.0375174	0.000562878	0.110769	0.0367337	0.0503353	0.274758	0.226678	0	0.0308155	0	0.0682724
Lesotho	0	0.159728	0.708826	0	0.0113289	0.0873026	0.0210951	0.0117195	0	0	0	0	0
Liberia	0.318471	0	0	0.0138717	0.0349623	0.0112452	0.150685	0.0647109	0.0543858	0	0.00511145	0	0.346556
Libya	0	0.254958	0.237818	0	0.102109	0.0199545	0.0139593	0.0775258	0.208656	0	0.0764091	0.00764091	0.000969807
Liechtenstein	0	0	0	0	0	0	0	0	0	0	0	0	0
Lithuania	0	0.282565	0.289969	0.0587577	0.0170558	0.0309892	0.0853178	0.0329406	0.0074936	0.00671302	0	0.165093	0.0231053
Luxembourg	0	0.297063	0.328882	0.112732	0.00207795	0.0119413	0.0229683	0.0978299	0	0	0.00193942	0.124566	0
Madagascar	0.454932	0.00192054	0.0665046	1.5676e-05	0.0150206	0.0348864	0.180899	0.057237	0.0420251	0.00844259	0.00572197	0	0.132394
Malawi	0.0165094	0.00110285	0.514763	0.00154998	0.0105887	0.155084	0.125314	0.0299419	0.0743479	0.000157258	0.000698923	0.0119715	0.0579701
Malaysia	0.120813	0	0.0049955	0	0.00531022	0	0.00832214	0.0154038	0.58695	0	0.00121365	0	0.256992
Maldives	0	0	0	0	0.250066	0.0118452	0.137536	0.131614	0.421163	0	0.0421163	0.000658068	0.00500132
Mali	0.119309	0.00113965	0.257435	0.00033826	0.0178282	0.088229	0.00305715	0.0146704	0.150131	0.00062321	0.000467407	0.344002	0.00277017
Malta	0	0.205789	0.0447949	0	0.426974	0.0645591	0.157683	0.100022	0.000176874	0	0	0	0
Marshall Islands	0	0	0	0	0	0	0	0	1	0	0	0	0
Martinique	0	0	0	0	0.0826545	0.119789	0.0979875	0.525491	0.0239578	0	0	0	0.15012
Mauritania	0.0592915	0.00168322	0.532043	0	0.027295	0.293113	0.008262	0.01701	0.0237533	0	0	0.0375496	0
Mauritius	0	0	0.000842666	0	0.0689935	0	0.00847652	0.00945083	0.00758746	0.00127878	0	0	0.90337
Mayotte	0	0	0	0	0	0	0	0	0	0	0	0	0
Mexico	0.00373251	0.0380606	0.600398	0.00451864	0.0380211	0.106427	0.00477881	0.0682883	0.032259	0.00408916	0.00589824	0.000104328	0.0934244
Micronesia	0.402156	0	0.201436	0	0	0	0	0	0	0	0	0	0.396408
Moldova	0	0.184245	0.214038	0.328775	0.0297198	0.0251703	0.0325328	0.133237	0	0	0.00256084	0.00676095	0.0429601
Mongolia	0	0.904178	0.0208227	0	0.0258712	0.00722256	0.037957	0.000337053	0	0	0.00361128	0	0
Montserrat	0	0	0.0406257	0	0.451134	0	0.142764	0.296949	0.0685267	0	0	0	0
Morocco	0.000771742	0.430637	0.316776	0.00856029	0.0224877	0.051288	0.00864966	0.040103	0.0791713	0.000352834	0.0201539	0.00172183	0.0193268
Mozambique	0.0502744	0.000418022	0.394915	0.00500427	0.00525582	0.108124	0.236917	0.0128189	0.147626	0.00226305	0.0125725	0.0135944	0.0102167
Burma	0.48783	0.00605509	0.0172181	0.0390146	0.0224962	0.186484	0.00318622	0.0243783	0.15287	0.00294164	0	0.0231567	0.0343692
Namibia	0	0.00369172	0.173843	0.000356773	0.0077972	0.0314446	0.0799439	0.00746143	0.011408	0	0	0.684053	0
Nauru	0	0	0	0	0.142857	0	0	0.0952381	0.761905	0	0	0	0
Nepal	0.338122	0.139515	0.194137	0.00386496	0.0342161	0.0636398	0.0317847	0.0201501	0.0870805	0.00323931	0.000222863	0.0587132	0.0253143
Netherlands	0	0.218166	0.106522	0.00177188	0.117898	0.00489906	0.29427	0.0391076	0.00811284	0.00718529	0	0.0205761	0.181491
New Caledonia	0	0.000472424	0.101474	0	0.184193	0.00269551	0.319867	0.154093	0.224626	0	0	0	0.012579
New Zealand	0	0.19581	0.281603	0.0104432	0.174575	0.0740029	0.0470262	0.179177	0.00180495	0.0216594	0	0.0126346	0.00126346
Nicaragua	0.100821	0	0.367406	0.00520935	0.0130452	0.24762	0.00901052	0.0289683	0.0424618	0.00556205	0	0	0.179896
Niger	0.00229133	0.000797567	0.20502	0	0.00543823	0.244512	0.000981774	0.000940323	0.0437523	0	0	0.494676	0.0015902
Nigeria	0.0574448	0.00173372	0.238928	0.0112556	0.0328025	0.0891179	0.182159	0.0400465	0.157539	2.40664e-05	0.00629336	0.143123	0.0395336
Niue	0	0	0	0	0.00343171	0	0.132922	0.148707	0.714939	0	0	0	0
Northern Mariana Islands	0	0	0	0	0	0	0	0	0	0	0	0	0
Norway	0	0.1789	0.723466	0.0166248	0.0144917	0	0.0421082	0.0139031	0	0	0	0.0105064	0
Occupied Palestinian Territory	0	0.128762	0.0465965	8.99879e-05	0.106753	0.0348345	0.01102	0.107979	0.523863	0	0.0356653	0.000649898	0.00378636
Oman	0	0.00842509	0.035382	0	0.16691	0	0.0126236	0.752786	0	0	0	0.0189897	0.00488306
Pakistan	0.12029	0.424038	0.0657891	0.023292	0.0177499	0.077813	0.00677756	0.0307019	0.155172	0.000154432	0.000787524	0.0193711	0.0580634
Palau	0	0	0	0	0	0	0	0	0	0	0	0	0
Panama	0.302588	0	0.201787	0.000681163	0.0314401	0.0687367	0.0256016	0.111068	0.0362324	0	0	0	0.221865
Papua New Guinea	0.000367511	0	0.00229505	0	0.0410837	0.00537674	0.195337	0.161066	0.358091	0	0.0105384	0	0.225845
Paraguay	0.00840136	0.054917	0.104324	0.591745	0.0152601	0.0217818	0.0697782	0.0137642	0.0874426	0	0	0	0.0325852
Peru	0.10587	0.0582595	0.228849	0.00117585	0.0712317	0.067526	0.168038	0.10667	0.0433686	7.93024e-05	0.00118123	0.0140014	0.13375
Philippines	0.325754	0	0.184428	9.25648e-05	0.0472542	0.00637791	0.0305335	0.0748705	0.263501	0.00942774	0.00243716	0	0.0553237
Poland	0	0.221118	0.145549	0.0508632	0.0214677	0.0121137	0.107381	0.0335537	0.00133395	0.000358044	0.000128793	0.374755	0.0313775
Portugal	0.0136837	0.129777	0.142495	0.0412661	0.0496461	0.0221268	0.0354938	0.247183	0.216673	0	0.0501509	0.0402073	0.0112976
Puerto Rico	0	0	0.00388619	0	0.0778046	0.00263887	0.0313471	0.289704	0.0151273	0	0	0	0.579492
Qatar	0	0.0051296	0.183635	0	0.453517	0	0.000406499	0.329264	0	0	0	0.0270999	0.000948497
Réunion	0.000923212	0	0.0315291	0	0.166048	0.0342733	0.00546009	0.149975	0.0183185	0.00101638	0	0	0.592456
Romania	0.000171784	0.23664	0.433623	0.1809	0.035752	0.00518597	0.0354981	0.0562793	0.00068397	0.000113011	0.000268967	0.00233456	0.0125493
Russia	0.00295948	0.406415	0.205271	0.141271	0.0161503	0.0148492	0.0598987	0.0152369	0.00423494	0.00242484	0.000449835	0.116538	0.0143016
Rwanda	0.00293885	0.0088302	0.165142	0.0169614	0.0307811	0.230508	0.270955	0.235707	0.00854445	0	0	0.00317331	0.026459
Saint Helena	0	0	0	0	0	0	0	0	0	0	0	0	0
Saint Kitts and Nevis	0	0	0	0	0.00670241	0.0469169	0.081546	0.0446828	0.0516086	0	0	0	0.768543
Saint Lucia	0	0	0	0	0.00992204	0.00141743	0.122608	0.569809	0.248051	0	0	0	0.0481928
Saint Pierre and Miquelon	0	0	0	0	0	0	0	0	0	0	0	0	0
Saint Vincent and Grenadines	0	0	0.0144504	0	0.037212	0.0276246	0.194997	0.457188	0.0658116	0	0	0	0.202716
Samoa	0	0	0	0	0.0254343	0	0.108339	0.211727	0.587153	0	0	0	0.0673467
San Marino	0	0	0	0	0	0	0	0	0	0	0	0	0
Sao Tome and Principe	0	0	0.0206836	0	0.0251107	0	0.0767968	0.0952113	0.274125	0	0	0	0.508073
Saudi Arabia	0	0.296896	0.370941	0	0.0875714	0.00473597	0.0159966	0.212953	0.00368965	0	0	0.00721629	0
Senegal	0.0364801	0	0.0909358	0	0.0108357	0.0573033	0.0123939	0.0070916	0.44222	0	0.0105205	0.328965	0.00325357
Serbia and Montenegro	0	0.226539	0.405979	0.140592	0.0525693	0.0166675	0.034477	0.0960707	0.00112982	2.4095e-05	0.00455494	0.00198767	0.0194087
Seychelles	0	0	0	0	0.0533667	0	0.00625391	0.0961017	0.145925	0	0	0	0.698353
Sierra Leone	0.38183	0	0.030021	0	0.0541607	0.14779	0.111535	0.0639661	0.0892714	0	0	0.0128696	0.108556
Singapore	0	0	0	0	0.940439	0	0.0031348	0.00940439	0.0470219	0	0	0	0
Slovakia	0	0.338536	0.291778	0.193089	0.0313543	0.0180804	0.0231364	0.0295139	0.00690066	0.00010001	0.00256435	0.0366872	0.02826
Slovenia	0	0.263559	0.407327	0.00166361	0.0207322	0.0022699	0.0631059	0.140797	0.00413093	0	0.000655591	0.023841	0.0719176
Solomon Islands	0.0175884	0	0	0	0.00655594	0.0406921	0.124186	0.0210996	0.693272	0	0.00376778	0	0.0928382
Somalia	0.000532285	0.00504662	0.736441	0	0.0175135	0.0798614	0.0105781	0.0291844	0.111806	0	0	0	0.00903695
Republic of South Africa	0.000216947	0.118722	0.564593	0.124912	0.0186376	0.0146765	0.0101225	0.0439129	0.0220576	0.000922728	0.000439394	0.0107945	0.0699933
Spain	0.00827074	0.166292	0.280598	0.0856566	0.0282788	0.0330604	0.00867916	0.132407	0.174475	0.00136028	0.0511414	0.013036	0.0167447
Sri Lanka	0.39814	0	0.0125547	0.0004895	0.0376699	0.0127017	0.0203096	0.0503941	0.226684	0	0.0113011	0.00330308	0.226452
Sudan	0.000486541	0.00799347	0.40199	0.000439181	0.0166232	0.0145945	0.00723651	0.0120665	0.340806	0	0	0.191228	0.00653656
Suriname	0.778785	0	0.000354665	0.000934738	0.0243475	0.0041782	0.00545066	0.0872295	0.034793	0	0	0	0.0639265
Swaziland	0.00031489	0.00160757	0.398764	0	0.0067883	0.0433987	0.0626612	0.0732266	0.196164	0	0.00417741	0	0.212897
Sweden	0	0.282341	0.475184	0.0470004	0.0127563	0.0206672	0.0236715	0.00403746	0.00766916	0	0	0.0867558	0.039917
Switzerland	0	0.33744	0.273644	0.0686828	0.0389115	0.00953568	0.0522984	0.0893397	0	0	0.00924	0.0527789	0.0681284
Syria	0	0.394344	0.273308	0.00197699	0.0215832	0.0601808	0.00508915	0.0428791	0.170869	0	0.0116707	0.000781812	0.0173167
Tajikistan	0.0247406	0.407966	0.0454585	0.00565843	0.0489335	0.0124982	0.0305569	0.123289	0.287965	0	0.00803782	0.000334709	0.00456116
Tanzania	0.0618808	0.0105701	0.473352	0.00873987	0.0202757	0.084482	0.139395	0.0430626	0.0882097	0.00469614	0.0105878	0.0297672	0.0249806
Thailand	0.548751	7.16964e-05	0.0660165	0.0233164	0.0197406	0.0190324	0.0652253	0.0455593	0.042966	0.00114655	0.00221584	0.00147723	0.164481
Macedonia	0.0103898	0.356591	0.222267	0.0445871	0.150555	0.031375	0.0369892	0.1241	0	0	0.00686022	0.0162853	0
East Timor	0.0934581	0	0.319679	0.00496149	0.0439228	0.0254379	0.143018	0.00276426	0.0226115	0	0	0	0.344147
Togo	0.0254648	0	0.417945	0	0.0190608	0.109538	0.144203	0.00562016	0.160053	0	0.000188183	0.0601469	0.0577794
Tokelau	0	0	0	0	0	0	0.0257649	0.00805153	0.966184	0	0	0	0
Tonga	0	0	0	0	0.285617	0	0.108819	0.151254	0.437099	0	0	0	0.0172108
Trinidad and Tobago	0.0329511	0	0.00558303	0	0.0350797	0.00792628	0.0078792	0.154288	0.0667063	0	0	0	0.689587
Tunisia	0	0.233456	0.105585	0.00786419	0.0395481	0.0291266	0.00640042	0.0599639	0.430232	0	0.069072	0.0120804	0.00667128
Turkey	0.00396142	0.432194	0.214505	0.0346114	0.0487384	0.0736571	0.0097959	0.0488727	0.0647792	0	0.0235016	0.00757239	0.0378106
Turkmenistan	0.0473075	0.452908	0.0279995	0	0.0340757	0.00261117	0.00979187	0.0336188	0.375029	0	0.00125336	0	0.0154059
Tuvalu	0	0	0	0	0.0262467	0	0	0.0288714	0.944882	0	0	0	0
Uganda	0.0124326	0.00154268	0.142931	0.0266227	0.0143871	0.139401	0.162897	0.276893	0.102765	0	0	0.0610865	0.0590406
Ukraine	0.000728718	0.230817	0.238244	0.248674	0.0310432	0.0191841	0.0840208	0.0238308	0.00251393	0.00117454	0.000857723	0.0800284	0.0388827
United Arab Emirates	0	0.000256257	0	0	0.178549	0	0.00373799	0.817052	0	0	0.000178414	0	0.000226281
United Kingdom	0	0.446081	0.25295	0.119303	0.030242	0.0454254	0.0363228	0.00567358	0.0161921	0.00393862	0	0.00551406	0.0383578
United States	0.012389	0.194162	0.386999	0.286376	0.014061	0.00820426	0.00576237	0.0128553	0.060608	0	0.00362162	0.00330017	0.0116612
Uruguay	0.150725	0.21213	0.170543	0.325462	0.0278965	0.0105776	0.0239961	0.0587978	0.00955031	0	0	0.00449426	0.00582649
US Virgin Islands	0	0	0	0	0	0	0	0	0	0	0	0	0
Uzbekistan	0.0380775	0.374998	0.0249616	0.00352422	0.046547	0.00203713	0.0145669	0.0663742	0.417743	0.000558118	0.0027292	0.00122786	0.00665556
Vanuatu	0	0	0.0154433	0	0.00762533	0	0.0566123	0.0186012	0.866514	0	0	0	0.0352036
Venezuela	0.0766252	0.00083594	0.38848	0.00430622	0.0358755	0.0191364	0.0476536	0.120464	0.0633763	0.00571559	0	0	0.237532
Vietnam	0.610624	0	0.0529674	0.0146538	0.0461691	0.028093	0.0424105	0.0366661	0.038167	0.00120725	0.0161592	0.000154985	0.112728
Wallis and Futuna Islands	0	0	0	0	0.0382505	0	0.0874758	0.211588	0.661717	0	0	0	0.000968367
Western Sahara	0	0	0	0	0	0	0	0	0	0	0	0	0
Yemen	0	0.0885039	0.471235	0	0.0532989	0.0549732	0.0181962	0.0992477	0.0625156	0	0.000192326	0.110391	0.0414463
Zambia	0.0107166	0.0134328	0.498677	0.0382527	0.0307497	0.0281002	0.136166	0.0127816	0.150313	0	0	0.0524703	0.0283411
Zimbabwe	9.44283e-05	0.0223561	0.549396	0.0283275	0.00749155	0.0238537	0.0149455	0.0141692	0.22898	0.00109612	0.000347975	0.0534698	0.0554721
