# Supplementary material for: Projecting Global Land-Use Change and Its Effect on Ecosystem Service Provision and Biodiversity with Simple Models
Source: PLoS One. 2010 Dec 15;5(12):e14327. doi: 10.1371/journal.pone.0014327 (PMC3002265; doi:10.1371/journal.pone.0014327)
Supplement: Table S19 — Average water yield on rainfed cropland in 2000 and under both scenarios by country. (0.05 MB XLS) [file pone.0014327.s026.xls]

## Sheet: Sheet1
Table S19. Average water yield on rainfed cropland in 2000 and under both scenarios by country.
	2000		Country scenario - 2015				Regional scenario - 2015
Country	Mean annual water yield on rainfed cropland grid cells (mm km-2)	Std. dev. of annual water yield on rainfed cropland grid cells	Mean annual water yield on rainfed cropland grid cells (mm km-2)	Std. dev. of annual water yield on rainfed cropland grid cells	Mean annual water yield on 2015 rainfed cropland grid cells in 2000 (mm km-2)	Std. dev. of annual rainfall on rainfed cropland grid cells	Mean annual water yield on rainfed cropland grid cells (mm km-2)	Std. dev. of annual water yield on rainfed cropland grid cells	Mean annual water yield on 2015 rainfed cropland grid cells in 2000 (mm km-2)	Std. dev. of annual rainfall on rainfed cropland grid cells
Afghanistan	127.44	116.329	156.79	149.244	127.268	116.492	156.487	149.179	127.18	116.358
Algeria	162.241	83.7465	174.806	79.0151	157.774	69.4799	179.062	84.1418	156.867	74.543
Azerbaijan	312.628	135.423	278.575	121.77	312.026	135.904	236.598	124.856	262.663	139.966
Albania	709.37	136.742	668.128	130.38	709.219	136.517	668.179	131.086	708.005	135.948
Armenia	368.82	87.2767	328.024	80.6497	367.973	87.5096	328.524	80.3545	368.586	87.2699
Angola	379.37	120.529	331.56	129.273	386.748	125.57	367.738	164.25	402.743	134.82
Argentina	494.956	129.914	505.137	120.821	492.16	133.201	500.302	150.673	464.918	159.475
Australia	213.143	178.425	235.352	219.978	246.571	223.866	200.75	173.203	212.936	178.331
Austria	406.736	90.6783	379.026	91.0114	406.506	94.3988	381.197	86.1876	408.294	89.9792
Botswana	149.669	51.7171	111.646	45.4062	149.628	51.5126	122.656	42.1322	157.066	56.9231
Belgium	564.87	68.0176	545.458	64.1781	561.112	60.6571	544.64	63.1021	561.213	61.3856
The Bahamas					336.969	0	0	0	0	0
Bangladesh	1578.42	582.262	1597.72	587.578	1580.42	586.204	1586.62	579.617	1572.72	579.678
Belize	1208.02	401.471	1289.41	381.93	1172.64	396.301	1267.13	402.138	1205.42	399.758
Bosnia & Herzegovina	751.292	151.362	669.666	148.428	751.635	150.412	670.733	148.773	752.693	150.744
Bolivia	528.798	339.101	520.816	343.375	538.405	342.74	544.96	384.724	557.772	363.946
Myanmar	1475.05	714.509	1460.43	697.156	1437.76	710.981	1447.93	691.475	1418.23	709.793
Benin	441.206	108.77	484.095	103.632	458.706	125.687	474.802	104.017	441.361	108.674
Belarus	348.85	23.0757	310.679	23.3317	350.352	21.8034	308.626	22.5864	348.296	22.9028
Solomon Is.	1537.85	0	1638.78	0	1537.85	0	1638.78	0	1537.85	0
Brazil	827.073	348.698	757.293	357.931	811.511	355.052	889.474	482.63	895.953	418.917
Bhutan	1718.51	264.915	1616.9	236.702	1719.05	264.567	1616.9	236.702	1719.05	264.567
Bulgaria	317.425	67.7489	275.761	66.4447	302.442	67.8371	292.384	66.4786	318.898	67.8764
Brunei	2527.45	318.986	2558.66	248.116	2247.47	315.196	2506.85	334.115	2519.14	313.683
Burundi	776.897	162.378	695.951	171.782	776.569	163.126	696.191	174.482	777.512	162.721
Canada	276.128	156.614	271.797	146.442	274.044	154.822	270.349	146.632	273.982	155.983
Cambodia	1251.36	404.842	1157.39	397.379	1247.74	404.792	1120.45	378.834	1103.2	431.552
Chad	137.719	66.493	151.34	70.6591	131.695	63.8929	151.063	70.1763	131.091	62.452
Sri Lanka	1362.5	429.918	1239.01	434.64	1341.51	433.88	1243.15	430.578	1353.38	426.768
Congo	1052.67	89.296	965.92	109.205	1041.79	105.252	1051.25	157.774	941.373	239.661
Congo, DRC	1039.84	146.931	986.926	144.474	1043.25	142.737	964.693	160.836	832.666	224.788
China	323.58	260.97	325.416	248.292	316.897	252.22	326.517	253.88	321.442	257.98
Chile	638.1	376.493	584.874	332.758	627.845	357.946	600.111	334.228	646.3	358.208
Cameroon	676.921	477.283	648.005	423.214	678.988	478.603	968.129	545.706	813.951	438.654
Comoros							0	0	0	0
Colombia	1540.62	698.852	1380.48	667.29	1565.39	723.966	1376.04	650.999	1549.1	701.293
Northern Mariana Is.							0	0	0	0
Costa Rica	2143.35	887.174	2007.13	891.236	2138.34	884.062	1983.6	870.958	2125.32	876.466
Central African Republic	412.25	234.343	423.961	220.671	413.874	235.718	644.609	281.099	517.706	220.511
Cuba	756.592	145.057	776.139	181.087	732.425	163.788	786.731	176.138	757.251	144.296
Cyprus	123.553	51.5424	104.092	52.2413	122.309	51.3072	181.613	60.1033	196.863	57.2048
Denmark	427.523	146.853	426.923	158.157	428.497	147.157	425.371	157.478	427.209	146.517
Djibouti	59.2738	5.61193	70.7624	7.9956	59.2738	5.61193	70.7624	7.9956	59.2738	5.61193
Dominican Republic	858.876	186.878	915.154	207.917	863.924	186.003	916.711	206.72	865.966	184.858
Ecuador	1178.54	819.197	1123.12	761.424	1207.91	827.172	1110.51	767.742	1191.45	828.077
Egypt	2.74184	7.95287	2.04369	3.31307	2.23948	6.95444	1.94081	2.91841	2.13368	6.80353
Ireland	667.018	105.335	636.282	95.768	659.888	98.8562	629.756	75.9484	655.966	79.3216
Equatorial Guinea	1596.46	173.71	1533.67	185.558	1596.34	165.901	1615.74	193.492	1490.13	222.718
Estonia	372.196	33.758	335.47	32.3928	354.57	27.763	350.724	37.897	368.725	32.34
Eritrea	144.2	60.0052	154	62.2538	141.449	60.4815	155.142	62.3619	142.945	60.1828
El Salvador	1111.81	244.497	1063.43	251.763	1098.12	255.669	1063.43	251.763	1098.12	255.669
Ethiopia	666.71	306.093	675.837	306.918	642.959	306.684	689.491	302.627	662.025	305.961
Czech Republic	366.819	78.7901	350.939	78.125	365.844	76.423	350.661	77.8536	365.607	76.0351
French Guiana							2110.14	222.766	2109.56	248.089
Finland	260.259	36.4948	254.96	31.1351	262.983	31.0646	255.237	33.3684	262.692	32.5273
Fiji	2175.36	112.804	1940.39	67.5957	2170.19	96.8144	1947.17	61.9352	2172.29	97.925
Falkland Is.	302.292	14.687	308.782	16.6371	303.312	13.7891	0	0	0	0
France	510.112	135.984	467.128	138.999	506.986	136.372	456.457	130.845	500.256	126.501
The Gambia	439.208	64.3032	334.511	57.2351	435.523	85.1067	337.288	62.539	438.18	62.6392
Gabon	1411.94	231.059	1390.27	267.096	1405.63	233.882	1259.52	241.517	1039.4	306.307
Georgia	600.396	177.563	555.184	166.303	602.123	177.114	543.958	190.161	572.905	192.368
Ghana	696.229	107.716	702.113	102.052	657.168	136.814	704.086	99.643	685.244	119.192
Germany	410.261	102.043	398.161	102.749	409.753	101.059	393.422	105.717	405.48	103.878
Guadeloupe							0	0	0	0
Guam							0	0	0	0
Greece	341.917	137.151	326.925	136.479	341.999	136.51	320.599	132.114	338.047	131.847
Guatemala	2206.93	632.08	2222.67	637.207	2182.47	640.726	2226.63	637.356	2210.93	631.213
Guinea	1401.71	231.349	1376.77	296.524	1291.9	310.276	1330.98	312.703	1257.81	318.666
Guyana	1685.66	62.2411	1116.59	83.4108	1551.59	303.709	1324.68	292.689	1313.66	369.831
Haiti	994.8	294.184	1112.54	362.312	995.258	295.626	1101.79	363.825	987.774	297.993
Honduras	1251.15	304.292	1229.61	305.873	1248.34	303.121	1228.81	304.645	1248.01	303.022
Croatia	745.23	236.495	564.464	193.976	643.152	196.828	668.167	233.628	745.783	236.129
Hungary	305.573	59.9613	257.438	49.1545	305.24	58.699	257.61	49.4902	305.416	58.9094
Indonesia	2105.24	548.824	2338.84	754.976	2089.18	607.741	2148.89	611.483	2095.53	550.839
India	645.904	613.059	664.328	579.931	640.972	605.991	661.455	573.059	630.564	598.652
Iran	149.769	101.372	151.725	96.413	149.708	100.547	151.725	96.413	149.708	100.547
Israel	278.791	70.9543	243.243	90.9173	262.102	101.378	266.234	69.8905	289.121	77.1301
Italy	389.158	172.034	391.757	195.986	398.332	187.875	382.707	184.979	390.854	177.004
Cote d'Ivoire	872.996	210.035	887.894	225.39	840.227	222.678	887.578	222.263	870.896	210.423
Iraq	327.154	114.553	314.53	111.882	321.76	115.998	317.848	114.316	324.657	117.484
Japan	1145.02	291.837	1210.37	278.357	1143.97	287.304	1216.57	277.574	1146.29	287.463
Jamaica	1362.84	125.177	1472.94	75.4923	1368.06	114.936	1472.94	75.4923	1368.06	114.936
Jordan	156.956	12.5045	150.723	10.6637	159.021	11.5969	150.723	10.6637	159.021	11.5969
Kenya	660.269	352.59	519.341	295.479	615.052	343.331	473.47	301.993	566.158	354.936
Kyrgyzstan	256.485	62.6689	295.289	72.4675	257.238	62.4376	294.542	72.9864	256.6	62.8861
North Korea	794.461	133.76	772.474	119.766	786.579	138.065	775.961	120.009	798.895	130.846
South Korea	1017.88	143.364	1157.26	167.533	1024.9	141.33	1157.9	162.1	1024.96	136.829
Kazakhstan	125.312	52.252	118.823	61.7692	125.662	52.0163	118.058	61.6295	125.539	52.4295
Laos	1175.52	241.704	1130.71	190.019	1173.35	241.387	1130.25	190.286	1172.81	241.544
Lebanon	362.854	66.5482	340.247	67.6347	357.604	62.1891	340.055	67.8716	357.349	62.2363
Latvia	367.393	46.8376	344.448	50.1677	342.437	61.858	344.568	51.539	367.831	45.7237
Lithuania	372.751	57.5667	331.478	54.0277	356.186	49.7142	347.212	61.5304	372.064	57.2314
Liberia	1830.62	265.696	1916.65	284.988	1812.25	278.744	1913.12	282.557	1797.67	288.692
Slovakia	478.967	135.217	441.622	152.533	481.694	152.303	433.455	130.507	471.538	131.805
Lesotho	484.271	86.8279	470.089	92.9469	483.437	85.0882	471.355	91.6919	484.335	83.4862
Luxembourg	705.683	116.41	704.078	104.835	708.686	119.727	722.823	99.9047	736.248	99.7867
Libya	16.5692	21.5801	10.3946	22.9179	10.1959	20.3338	2.02309	10.4253	6.07571	29.0891
Madagascar	1554.84	463.623	1345.1	415.079	1510.12	477.227	1220.94	470.086	1356.77	540.977
Moldova	256.494	26.8207	222.834	19.0991	255.975	25.6554	223.629	19.159	254.532	28.5044
Mayotte							0	0	0	0
Mongolia	156.635	56.4784	165.2	62.8739	156.82	56.5857	164.992	62.8684	156.574	56.6168
Montserrat							0	0	0	0
Malawi	582.689	112.978	448.237	101.172	574.964	147.094	470.259	127.361	601.753	147.394
Macedonia	394.807	97.9722	364.462	95.9842	392.408	97.0549	367.712	95.5282	395.297	96.8824
Mali	273.821	139.045	255.535	145.567	272.649	142.572	259.056	162.468	271.204	152.842
Morocco	128.378	38.4577	143.488	43.0559	128.912	39.0259	143.829	42.6988	128.862	38.4745
Mauritania	94.3314	37.4846	72.2251	28.4558	94.8659	38.1914	67.0466	30.6751	91.4007	42.5332
Oman	30.3563	4.30908	10.7006	7.48076	32.3717	5.08892	8.99016	7.83305	33.1578	5.16547
Mexico	746.699	464.707	718.53	458.818	740.87	466.009	720.497	456.116	744.811	464.183
Malaysia	2181.3	536.071	2228.41	570.051	2159.82	540.603	2202.03	563.144	2193.37	539.172
Mozambique	410.25	215.725	384.521	185.795	431.915	218.076	377.799	190.964	429.175	222.245
New Caledonia	927.136	49.7257	780.603	58.6474	933.234	38.6496	780.603	58.6474	933.234	38.6496
Niger	210.573	67.167	241.96	78.0393	207.773	67.7415	205.738	89.2773	179.054	75.033
Vanuatu	2051.43	107.943			2093.27	0	0	0	2093.27	0
Nigeria	599.719	361.911	658.402	358.532	617.858	355.446	635.91	350.739	598.325	355.937
Netherlands	490.394	42.8315	485.646	42.7567	485.154	41.8758	483.89	44.0442	489.424	40.8293
Norway	854.772	453.39	864.034	463.539	853.137	452.128	863.288	464.295	853.019	453.167
Nepal	1173.03	338.062	1284.09	319.497	1153.45	342.491	1283.75	318.594	1150.36	343.507
Suriname	1419.19	20.0816	1019.03	32.2796	1279.8	206.233	1173.4	136.581	1142.64	175.059
Nicaragua	1461.35	594.336	1455.63	575.604	1511.2	597.244	1380.44	523.713	1465.5	589.698
New Zealand	932.485	408.469	994.414	441.497	917.011	408.841	980.825	436.939	901.396	404.795
Paraguay	756.236	365.987	764.475	314.526	693.866	324.792	657.945	362.674	673.876	401.732
Peru	600.536	497.278	570.042	530.366	625.725	524.199	669.837	569.156	686.02	512.878
Pakistan	84.4934	113.87	148.022	188.062	84.6202	114.895	148.032	188.053	84.6366	114.901
Poland	338.879	74.7556	321.011	73.6255	339.008	72.9942	320.534	73.7812	338.485	73.2752
Panama	1724.56	445.849	1567.88	427.913	1673.97	473.381	1568.65	423.974	1680.38	468.099
Portugal	455.416	144.204	394.804	101.835	366.92	116.85	460.05	121.901	443.766	140.673
Papua New Guinea	1898.47	872.159	2286.42	1078.31	1878.45	874.989	2234.46	1063.08	1894.07	871.814
Palau							0	0	0	0
Guinea-Bissau	948.381	188.754	837.314	200.315	898.959	193.054	805.932	169.6	746.923	216.472
Romania	342.897	105.499	302.191	97.8406	339.865	103.127	301.731	96.7599	339.672	101.188
Philippines	1563.54	520.306	1522.72	499.549	1558.74	519.605	1524.74	499.853	1564.44	520.066
Puerto Rico	1299.53	229.358	1621.45	100.04	1292.03	209.745	1621.45	100.04	1292.03	209.745
Russia	262.223	97.3502	247.325	91.246	268.665	92.2646	242.524	96.1471	262.245	97.0195
Rwanda	693.189	150.503	632.207	168.302	684.645	151.375	636.693	170.214	691.46	150.192
Saudi Arabia	65.2049	46.433	54.6962	37.408	52.0939	38.1847	56.2465	37.1802	57.7302	37.3706
South Africa	222.498	78.1423	187.244	73.0592	221.184	78.5552	182.755	71.5573	218.902	75.3044
Senegal	262.021	128.327	201.062	116.011	278.811	154.87	196.84	119.017	271.525	153.664
Slovenia	676.872	261.679	590.3	250.756	663.692	253.109	569.271	239.551	641.939	241.55
Sierra Leone	1857.98	282.445	1921.88	301.875	1796.31	329.296	1937.58	304.213	1850.26	288.977
San Marino	365.623	1.67038	335.886	2.40231	365.719	1.95013	335.455	0	365.368	0
Somalia	125.041	15.9739	108.842	18.1676	123.259	18.5715	105.453	22.2347	118.97	25.0829
Spain	288.748	148.336	290.395	126.893	288.803	148.057	282.667	120.262	279.852	139.219
Sudan	244.31	99.2755	273.111	122.399	272.546	132.494	292.507	177.335	266.291	133.542
Sweden	391.936	83.8264	389.783	84.683	392.037	81.4452	391.414	85.0582	393.638	81.7544
Syria	245.787	121.433	211.044	118.65	224.573	122.338	231.281	117.835	241.958	121.213
Switzerland	946.716	106.884	923.646	107.788	948.508	106.354	917.792	120.578	943.568	118.681
Trinidad & Tobago	1100.17	0	785.849	0	1100.17	0	820.927	35.903	947.793	155.962
Thailand	934.104	440.11	834.975	424.021	921.006	422.237	858.111	443.35	934.095	439.023
Tajikistan	393.477	83.0161	438.912	92.3226	393.189	83.6455	434.316	98.4296	390.117	88.0671
Togo	561.163	118.282	600.381	112.221	559.915	127.861	594.986	113.367	561.703	116.393
Tunisia	226.27	15.6494	216.544	100.066	193.814	71.6481	216.544	100.066	193.814	71.6481
Timor Leste	827.484	220.181	643.088	128.104	813.93	233.145	618.903	129.046	796.831	244.444
Turkey	332.354	106.603	321.032	106.316	332.077	106.613	320.363	106.603	331.407	107.008
Turkmenistan	34.8467	13.7959	37.5464	18.3112	31.7596	16.1647	35.1473	18.4774	30.0042	16.8876
Tanzania	473.633	176.228	407.064	171.659	478.483	180.485	398.477	167.776	475.963	177.409
Uganda	705.04	187.48	618.604	182.341	676.856	205.595	618.716	181.568	704.189	187.658
United Kingdom	479.239	134.927	437.193	131.441	468.54	131.953	442.321	134.75	472.812	133.319
Ukraine	306.083	59.5593	261.596	56.2629	306.052	58.8456	263.181	56.6952	300.402	61.0976
United States	492.346	265.243	450.003	261.375	490.272	264.81	465.499	258.51	507.728	261.202
Burkina Faso	312.697	74.2826	353.917	118.485	334.545	138.316	343.432	81.8978	310.17	78.9102
Uruguay	795.686	122.878	753.155	134.079	796.626	122.957	762.55	131.581	785.079	134.13
Uzbekistan	257.934	126.32	270.079	154.638	233.455	136.799	242.14	159.448	208.001	141.649
Venezuela	857.335	370.817	773.685	357.194	869.079	368.411	784.943	372.627	876.424	375.992
Vietnam	1168.61	224.962	1111.16	176.211	1161.97	228.072	1110.56	176.523	1164.23	226.259
Namibia	152.031	34.6003	137.176	32.5601	152.042	34.8376	124.629	31.3711	142.949	43.6715
West Bank	200.258	7.60997	182.846	2.29858	202.159	2.06859	182.665	2.29743	201.997	2.06756
Serbia & Montenegro	564.888	220.147	507.258	199.552	542.869	222.952	513.498	205.718	564.746	220.57
Yemen	93.0471	66.6607	108.588	77.8097	89.1783	66.0184	108.382	77.688	88.9967	65.9383
Zambia	450.374	161.072	371.431	143.167	445.712	159.134	513.872	163.901	431.261	127.604
Zimbabwe	340.928	100.725	263.775	90.4508	335.196	104.95	264.771	90.7884	336.638	105.104
Swaziland			320.586	74.8678	311.863	118.139	262.853	84.0846	192.403	94.3974
Global Totals	636.031		631.596		643.373		644.614		650.98
