# Supplementary material for: Projecting Global Land-Use Change and Its Effect on Ecosystem Service Provision and Biodiversity with Simple Models
Source: PLoS One. 2010 Dec 15;5(12):e14327. doi: 10.1371/journal.pone.0014327 (PMC3002265; doi:10.1371/journal.pone.0014327)
Supplement: Table S20 — Average biomass carbon storage by forest type by country in 2000 (Mg of carbon equivalent ha−1). (0.05 MB XLS) [file pone.0014327.s027.xls]

## Sheet: Sheet1
Table S20. Average biomass carbon storage by forest type by country in 2000 (Mg of carbon equivalent ha-1)
Country	Broadleaved, evergreen	Broadleaved, deciduous, closed	Broadleaved, deciduous, open	Needle-leaved, evergreen	Needle-leaved, deciduous	Mixed leaf type	Regularly flooded, fresh water (& brackish)	Regularly flooded, saline water	Mosiac: Tree cover / other natural vegetation	Burnt
Afghanistan	0	60.4466	0	0	0	0	0	0	0	0
Albania	0	48.2963	0	46.9011	0	36.7526	0	0	0	0
Algeria	79.0263	69.3552	0	0	0	0	0	43	0	0
Andorra	0	0	0	61	0	0	0	0	0	0
Angola	157.776	144.985	138.899	0	0	0	0	0	160.366	0
Anguilla	0	0	0	0	0	0	0	0	0	0
Antigua and Barbuda	0	0	0	127	0	0	0	0	0	0
Argentina	108.962	102.115	61.3684	0	0	65.4019	0	100.97	0	0
Armenia	0	37.3553	0	51.175	24.2	35.3929	0	0	0	0
Aruba	0	0	0	0	0	0	0	0	0	0
Australia	113.144	0	84.2324	0	0	0	33.1099	73.9574	0	0
Austria	0	45.4144	0	53.9141	0	58.9385	0	0	0	0
Azerbaijan	0	22.6667	0	36.8195	14.125	27.5682	0	0	0	0
Bahrain	0	0	0	0	0	0	0	0	0	0
Bangladesh	144.462	0	0	0	0	0	0	99.6346	75.6667	0
Barbados	0	0	0	0	0	0	0	0	0	0
Belarus	0	11.3514	0	11.8056	0	11.6129	0	0	0	0
Belgium	0	50.932	0	56.1942	0	0	0	0	0	0
Belize	137.842	0	0	128.5	0	0	75.5714	0	0	0
Benin	0	0	132.068	0	0	0	0	200	0	0
Bhutan	72.0753	66.3016	0	0	0	0	0	0	90	0
Bolivia	141.878	96.2523	0	0	0	0	176.776	0	0	0
Bosnia and Herzegovina	0	32.3805	0	54.1656	0	51.0909	0	0	0	0
Botswana	0	62.6	65.2236	0	0	0	0	0	0	0
Brazil	178.233	90.0621	97.0587	0	0	0	181.006	156	0	0
British Virgin Islands	0	0	0	0	0	0	0	0	0	0
Brunei	218.921	0	0	0	0	0	215.579	225	0	0
Bulgaria	0	24.5713	0	52.0307	0	46.1052	0	0	0	0
Burkina Faso	0	0	95.5992	0	0	0	0	0	0	0
Burundi	64.0769	61.1829	56.75	0	0	0	0	0	41.9	0
Cambodia	115.863	0	77.373	0	0	0	69.8148	0	50.0263	0
Cameroon	188.282	0	130.554	0	0	0	0	200	93.6088	0
Canada	0	36.2777	0	29.6067	0	33.1151	0	0	0	14.237
Cayman Islands	0	0	0	0	0	0	0	0	0	0
Central African Republic	191.363	0	127.847	0	0	0	200	0	99.5491	0
Chad	0	0	75.5828	0	0	0	0	0	76	0
Chile	89.2187	65.2557	70.0031	0	0	84.7378	0	0	0	0
China	84.6189	30.26	45.6193	76.3181	30.033	17.4793	0	0	34.1559	21.85
Colombia	168.354	103.664	0	0	0	0	151.726	125.98	0	0
Comoros	137.667	152	0	0	0	0	0	0	76	0
Congo	192.379	184.206	200	0	0	0	197.536	0	171.758	0
Congo, Democratic Republic of	188.406	160.556	158.149	0	0	0	198.46	0	142.166	0
Costa Rica	137.911	193	0	0	0	0	0	0	0	0
Côte d'Ivoire	193.657	0	143.853	0	0	0	0	0	200	0
Croatia	0	24.0037	0	51.5616	0	53.6354	0	0	0	0
Cuba	0	146.595	0	110.407	0	112.217	0	0	0	0
Cyprus	0	0	0	78	0	0	0	0	0	0
Czech Republic	0	27.4085	0	34.8763	0	0	0	0	0	0
Denmark	0	69	0	58.4667	0	57.9963	0	0	0	0
Djibouti	0	0	0	0	0	0	0	0	0	0
Dominica	0	0	0	0	0	0	0	0	4.15385	0
Dominican Republic	0	77.8889	0	102.933	0	135.182	0	0	4	0
Ecuador	136.103	54	0	0	0	0	182.278	156.154	0	0
Egypt	0	0	0	0	0	0	0	0	0	0
El Salvador	112.012	128	0	21.4	0	0	0	126	0	0
Equatorial Guinea	187.525	0	183.333	0	0	0	0	0	0	0
Eritrea	0	0	0	0	0	0	0	0	0	0
Estonia	0	11.0201	0	11.9917	0	10.7232	0	0	0	0
Ethiopia	70.5581	0	53.1381	0	0	0	0	0	49.5	0
Falkland Islands	55.4417	0	0	0	0	0	0	0	0	0
Faroe Islands	0	0	0	0	0	0	0	0	0	0
Fiji Islands	40.8333	0	0	0	0	0	0	0	112.5	0
Finland	0	30.6429	15.4657	30.2386	0	28.131	0	0	11.5221	4
France	0	52.1068	0	63.2358	0	63.0199	0	0	7.41135	0
French Guiana	190.568	0	0	0	0	0	193	193	0	0
French Southern & Antarctic Lands	0	0	0	0	0	0	0	0	0	0
Gabon	196.048	193.333	0	0	0	0	200	148.667	192.441	0
Gaza Strip	0	0	0	0	0	0	0	0	0	0
Georgia	0	47.4979	0	58.3296	0	48.0301	0	0	61	0
Germany	0	52.6025	0	53.2116	0	44.9929	0	0	0	0
Ghana	182.33	0	135.889	0	0	0	0	138.4	0	0
Greece	0	49.7063	0	67.8809	0	63.8897	0	0	0	0
Greenland	0	0	0	0	0	0	0	0	0	0
Grenada	151.333	0	0	0	0	0	0	0	0	0
Guadeloupe	0	0	0	128	0	0	0	0	4	0
Guam	0	0	0	0	0	0	0	0	0	0
Guatemala	127.755	128	0	65.6202	0	0	149.667	0	0	0
Guernsey	0	0	0	0	0	0	0	0	0	0
Guinea	171.717	0	137.151	0	0	0	0	189.492	0	0
Guinea-Bissau	152	0	142.59	0	0	0	0	153.474	86.875	0
Guyana	169.685	89.25	0	0	0	0	149.617	68	0	0
Haiti	0	0	0	81.9167	0	193	0	0	0	0
Honduras	169.5	171.333	0	97.4102	0	0	157.095	76.4	0	0
Hungary	0	11.8085	0	12	0	10.6667	0	0	0	0
Iceland	0	0	0	0	0	0	0	0	0	0
India	77.8033	76.5998	79.9337	0	0	0	0	97.0577	74.466	0
Indonesia	193.114	0	0	0	0	0	210.509	211.817	133.891	0
Iran	0	83.5	0	91.8893	0	0	0	0	0	0
Iraq	0	0	0	0	0	0	0	0	0	0
Ireland	0	24.9412	0	44.5333	0	0	0	0	0	0
Isle of Man	0	0	0	27.6667	0	0	0	0	0	0
Israel	0	0	0	0	0	0	0	0	0	0
Italy	0	64.5238	0	51.8069	0	63.1179	0	0	0	0
Jamaica	0	193	0	125.114	0	152.769	0	0	0	0
Japan	97.269	46.7616	0	82.6873	0	41.2887	0	0	0	0
Jersey	0	0	0	0	0	0	0	0	0	0
Jordan	0	0	0	0	0	0	0	0	0	0
Kazakhstan	0	19.0391	4.57143	14.2317	15.2417	16.708	0	0	14.6591	6.55
Kenya	85.6553	132.788	66.4353	0	0	0	0	0	68.0449	0
Kuwait	0	0	0	0	0	0	0	0	0	0
Kyrgyzstan	0	11.1373	5.90972	17.3125	7.30084	10.262	0	0	0	0
Laos	121.265	0	85.6345	5	0	0	0	0	51.2994	0
Latvia	0	10.9375	0	12.1514	0	10.5651	0	0	0	0
Lebanon	0	0	0	0	0	0	0	0	0	0
Lesotho	0	0	34.4167	0	0	0	0	0	0	0
Liberia	193.669	0	0	0	0	0	0	200	0	0
Libya	0	78.0364	0	0	0	0	0	0	0	0
Liechtenstein	0	0	0	60.7	0	0	0	0	0	0
Lithuania	0	9.70833	0	11.5976	0	10.4801	0	0	0	0
Luxembourg	0	43.5135	0	49	0	0	0	0	0	0
Macedonia	0	40.0814	0	70.2923	0	75.7156	0	0	0	0
Madagascar	109.204	91.1919	0	0	0	0	0	112.771	0	0
Malawi	107.036	120.969	104.302	0	0	0	0	0	87.8947	0
Malaysia	187.759	0	0	0	0	0	214.569	212.466	139.737	0
Mali	0	0	120.144	0	0	0	0	0	0	0
Malta	0	0	0	0	0	0	0	0	0	0
Martinique	0	0	0	0	0	0	0	0	0	0
Mauritania	0	0	0	0	0	0	0	0	0	0
Mayotte	133	0	0	0	0	0	0	0	0	0
Mexico	113.192	116.184	0	89.6203	0	0	0	0	4.66667	0
Moldova	0	8.84677	0	0	0	5	0	0	0	0
Mongolia	0	31.0648	0	13.7976	19.5482	12.4333	0	0	13.7979	11.3201
Montserrat	0	0	0	0	0	0	0	0	0	0
Morocco	66	53.0117	0	0	0	0	0	0	0	0
Mozambique	132.244	106.322	94.452	0	0	0	0	0	99.9569	0
Burma	120.346	64.6806	88.8606	69.3	0	0	0	147.928	61.0272	0
Namibia	0	67.8947	64.2717	0	0	0	0	0	0	0
Nepal	70.4531	71.568	0	0	0	0	0	0	0	0
Netherlands	0	0	0	55.9844	0	0	0	0	0	0
Netherlands Antilles	0	0	0	0	0	0	0	0	0	0
New Caledonia	152.07	0	0	0	0	0	0	0	86.1536	0
New Zealand	0	0	0	108.67	0	115.159	0	0	0	0
Nicaragua	170.704	146.923	0	103.091	0	0	176.176	90.9167	0	0
Niger	0	0	0	0	0	0	0	0	0	0
Nigeria	192.306	0	149	0	0	0	0	195.324	83.0092	0
North Korea	0	13.1875	10.8333	12.653	4.5	13.0519	0	0	0	0
Northern Mariana Islands	0	0	0	0	0	0	0	0	0	0
Norway	0	33	9.7945	21.2577	4	11.3496	0	0	6.625	0
Oman	0	0	0	0	0	0	0	0	0	0
Pakistan	40.8782	55.3161	0	0	0	0	0	54.6667	0	0
Palau	168.75	0	0	0	0	0	0	0	0	0
Panama	140.068	128	0	0	0	0	0	126	0	0
Papua New Guinea	183.14	184.6	0	0	0	0	199.188	201.128	145.826	0
Paraguay	107.737	106.601	0	0	0	0	0	0	0	0
Peru	158.664	47.9733	0	0	0	0	191.764	53	0	0
Philippines	172.097	0	0	0	0	0	0	0	141.071	0
Poland	0	36.045	0	25.447	0	21.4601	0	0	0	0
Portugal	0	63.2625	0	68.8072	0	59.6475	0	0	0	0
Puerto Rico	0	0	0	124.636	0	0	0	0	0	0
Qatar	0	0	0	0	0	0	0	0	0	0
Romania	0	18.6198	0	55.2819	0	51.2362	0	0	0	0
Russia	0	24.0331	0	26.592	21.2854	28.0114	0	0	13.0494	8.97007
Rwanda	65.9754	64.6875	49.4565	0	0	0	0	0	52.4688	0
San Marino	0	0	0	0	0	0	0	0	0	0
Sao Tome and Principe	0	0	0	0	0	0	0	0	0	0
Saudi Arabia	0	0	0	0	0	0	0	0	0	0
Senegal	138.636	0	108.979	0	0	0	0	123.077	67.6667	0
Serbia and Montenegro	0	17.2708	0	45.5985	0	39.3186	0	0	0	0
Sierra Leone	149.153	0	143.644	0	0	0	0	181.059	0	0
Singapore	0	0	0	0	0	0	0	0	0	0
Slovakia	0	25.0258	0	53.1609	0	55.7727	0	0	0	0
Slovenia	0	30.4243	0	54.2864	0	50.2324	0	0	0	0
Solomon Islands	202.795	0	0	0	0	0	0	0	192.142	0
Somalia	141.975	97.1129	82.2848	0	0	0	0	0	47.76	0
Republic of South Africa	89.6436	74.8865	67.082	0	0	0	0	0	82.4128	0
South Korea	0	13.4305	0	18.3369	0	0	0	0	0	0
Spain	0	59.0269	0	67.4551	0	58.0146	0	0	0	0
Sri Lanka	96.8304	89.469	0	0	0	0	0	0	0	0
Saint Kitts and Nevis	0	0	0	0	0	0	0	0	0	0
Saint Lucia	0	0	0	0	0	0	0	0	0	0
St. Pierre & Miquelon	0	0	0	0	0	0	0	0	0	0
Saint Vincent and Grenadines	0	0	0	0	0	0	0	0	0	0
Sudan	76.602	0	105.46	0	0	0	0	27.3333	97.0763	0
Suriname	165.601	88.125	0	0	0	0	125.864	0	0	0
Svalbard	0	0	0	0	0	0	0	0	0	0
Swaziland	48.3429	60.4714	63.5965	0	0	0	0	0	71.6136	0
Sweden	0	39.8929	11.9175	27.133	0	21.575	0	0	0	0
Switzerland	0	49.6529	0	51.1742	0	57.1709	0	0	0	0
Syria	0	0	0	67.3636	0	0	0	0	0	0
Tajikistan	0	0	4.5	0	4.5	4.5	0	0	0	0
Tanzania	109.306	121.358	98.1666	0	0	0	0	197.176	121.335	0
Thailand	125.782	0	84.6064	0	0	0	0	0	57.1828	0
Bahamas	0	0	0	103.546	0	0	0	0	4	0
Gambia	0	0	123.091	0	0	0	0	134.333	0	0
East Timor	147.638	0	0	0	0	0	0	0	152.625	0
Togo	193.75	0	138.828	0	0	0	0	0	0	0
Trinidad and Tobago	182.473	0	0	0	0	0	144.75	0	0	0
Tunisia	73.2	67.963	0	0	0	0	0	0	0	0
Turkey	78	54.2218	26.3333	59.1213	0	53.6916	0	0	0	0
Turkmenistan	0	0	0	0	0	0	0	0	0	0
Turks & Caicos Is.	0	0	0	0	0	0	0	0	0	0
Uganda	130.89	122.006	116.038	0	0	0	0	0	107.578	0
Ukraine	0	30.2334	0	26.5638	0	12.2808	0	0	5.38333	0
United Arab Emirates	0	0	0	0	0	0	0	0	0	0
United Kingdom	0	38.175	0	40.6782	0	56.7111	0	0	0	0
United States	169.271	50.6376	0	57.9067	0	55.5011	101.429	0	0	0
Uruguay	99.2849	79.677	0	0	0	0	0	0	0	0
Uzbekistan	0	5	4.7	0	5.38333	0	0	0	0	0
Vanuatu	131.294	0	0	0	0	0	0	0	156.906	0
Venezuela	148.158	86.3333	0	0	0	0	129.37	104.472	0	0
Vietnam	122.492	0	77.8515	45.8571	0	0	0	103.978	56.1065	0
Virgin Is.	0	0	0	0	0	0	0	0	0	0
Occupied Palestinian Territory	0	0	0	0	0	0	0	0	0	0
Western Sahara	0	0	0	0	0	0	0	0	0	0
Yemen	46	0	0	0	0	0	0	0	0	0
Zambia	152	143.843	122.178	0	0	0	0	0	152	0
Zimbabwe	71.5094	70.2169	65.9493	0	0	0	0	0	71.5041	0
